1 **Evidence for Behavioral Autorepression in Covid-19 Epidemiological Dynamics**

2  
3 Daniel D. Lewis, Michael Pablo, Xinyue Chen, Michael L. Simpson,  
4 Leor Weinberger

5  
6 dan.lewis@gladstone.ucsf.edu, mklpablo@gmail.com, xinyue.chen@gladstone.ucsf.edu,  
7 msimpso4@utk.edu, leor.weinberger@ucsf.edu

8  
9 Gladstone Institute of Virology  
10 Gladstone|UCSF Center for Cell Circuitry, The Gladstone Institute  
11 Department of Biochemistry and Biophysics  
12 Department of Pharmaceutical Chemistry  
13 University of California, San Francisco

14  
15 Keywords: viral dynamics; mathematical modeling; autorepression; nonlinear dynamics;

16  
17 Abbreviations: AIC: Akaike Information Criterion; COVID-19: COronaVirus Disease of 2019;  
18 SIR: Susceptible-Infective-Removed; SIRD: Susceptible-Infective-Recovered-Deceased; NPI:  
19 Non-Pharmaceutical Intervention

20  
21 Abstract: 167 words

22 Significance: 116 words

23 Main Text: 6000 words

24 Main Figures: 4 (color)

25 Supplemental Figures: 12 (color)

28 **Abstract** (250-word limit)

29 It has long been hypothesized that behavioral reactions to epidemic severity autoregulate infection  
30 dynamics, for example when susceptible individuals self-sequester based on perceived levels of  
31 circulating disease. However, evidence for such ‘behavioral autorepression’ has remained elusive,  
32 and its presence could significantly affect epidemic forecasting and interventions. Here, we  
33 analyzed early COVID-19 dynamics at 708 locations over three epidemiological scales (96  
34 countries, 50 US states, and 562 US counties). Signatures of behavioral autorepression were  
35 identified through: (i) a counterintuitive mobility-death correlation, (ii) fluctuation-magnitude  
36 analysis, and (iii) dynamics of SARS-CoV-2 infection waves. These data enabled calculation of  
37 the average behavioral-autorepression strength (i.e., negative feedback ‘gain’) across different  
38 populations. Surprisingly, incorporating behavioral autorepression into conventional models was  
39 required to accurately forecast COVID-19 mortality. Models also predicted that the strength of  
40 behavioral autorepression has the potential to alter the efficacy of non-pharmaceutical  
41 interventions. Overall, these results provide evidence for the long-hypothesized existence of  
42 behavioral autorepression, which could improve epidemic forecasting and enable more effective  
43 application of non-pharmaceutical interventions during future epidemics.

44

45 **Significance** (120-word limit)

46 Challenges with epidemiological forecasting during the COVID-19 pandemic suggested gaps in  
47 underlying model architecture. One long-held hypothesis, typically omitted from conventional  
48 models due to lack of empirical evidence, is that human behaviors lead to intrinsic negative  
49 autoregulation of epidemics (termed ‘behavioral autorepression’). This omission substantially  
50 alters model forecasts. Here, we provide independent lines of evidence for behavioral  
51 autorepression during the COVID-19 pandemic, demonstrate that it is sufficient to explain  
52 counterintuitive data on ‘shutdowns’, and provides a mechanistic explanation of why early  
53 shutdowns were more effective than delayed, high-intensity shutdowns. We empirically measure  
54 autorepression strength, and show that incorporating autorepression dramatically improves  
55 epidemiological forecasting. The autorepression phenomenon suggests that tailoring interventions  
56 to specific populations may be warranted.

57

## 58 INTRODUCTION

59 The dynamics of communicable diseases have historically been analyzed using  
60 Susceptible-Infective-Removed (SIR) models (1), wherein the rate of infection spread is mediated  
61 by density-dependent contact between the susceptible and infective populations, generating an  
62 inherent positive-feedback or auto-stimulatory loop. However, it has long been hypothesized that  
63 these infection rates can be buffered by human apprehension, thereby generating a form of negative  
64 feedback or autorepression. This phenomenon of “behavioral autorepression” postulates that,  
65 based on the size of the infective population, susceptible individuals self-sequester during an  
66 epidemic to reduce the effective contact rate and interrupt the spread of disease.

67  
68 Behavioral autorepression was first proposed in mathematical models of a cholera outbreak  
69 in the summer of 1973 centered around the Italian town of Bari on the Mediterranean coast (2, 3).  
70 Epidemiological data showed that daily cholera infections plateaued, rather than continuing to  
71 exponentially grow, and models argued this was due to reductions in contact rates as a result of  
72 human apprehension. The resulting behavioral autorepression models exhibited plateaus in daily  
73 infections through saturation of the contact rate, in contrast with canonical SIR models which  
74 predicted exponential rises and a peak in daily infections, followed by a steady drop (1).

75  
76 Despite the long history of the behavioral autorepression hypothesis, other  
77 epidemiological mechanisms have been proposed as alternate explanations of infection-rate  
78 saturation. For example, lockdown-limited transmission (4) can mimic the effects of  
79 autorepression, and depletion of high-risk individuals (5-7) can also generate comparable  
80 saturation of infection rates. Consequently, the role of behavioral autorepression and its relative  
81 contribution to population-scale disease transmission remain unclear.

82  
83 The lack of clarity surrounding behavioral autorepression has significant implications for  
84 epidemiological forecasts. In principle, behavioral autorepression would substantially reduce  
85 predicted infections and deaths in SIR-like models, potentially leading to improved forecasting of  
86 epidemic dynamics. Additionally, theoretical models have shown behavioral autorepression to be  
87 capable of generating multiple waves of infection (8, 9).

88

89           This potential of behavioral autorepression to influence disease dynamics catalyzed  
90 substantial modeling efforts to explore its epidemiologic impacts. Hypotheses suggested that  
91 autorepression may be a form of natural infection mitigation, since conventional policy  
92 interventions (a.k.a., non-pharmaceutical interventions) are notoriously challenging to maintain  
93 due to fatigue and poor adherence (10). Simulation-based approaches were used to examine how  
94 changes in the mathematical formulation of behavioral autorepression affect the sensitivity of  
95 epidemic dynamics to parameter changes (11, 12). Studies also modeled how changes in media  
96 coverage influenced changes in population-level psychology and fear to affect the propagation of  
97 cases numbers (9, 13, 14).

98  
99           Despite the potential importance of behavioral autorepression, previous disease outbreaks  
100 that may have manifested autorepression dynamics occurred during eras when consistent  
101 population-level behavioral metrics were largely unavailable (15). In contrast, the level of data  
102 collection during the COVID-19 pandemic was unprecedented. For example, modern  
103 improvements in epidemiological data recording practices were employed (16), and there was  
104 broad availability of mobile-phone geolocation data (17), which can quantify regional, population-  
105 level behavior at multiple geographic scales (18, 19). Thus, we hypothesized these datasets could  
106 enable a unique empirical analysis of an acute outbreak to quantify how human responses (e.g.,  
107 behavioral autorepression) influence contact rates and disease transmission.

108  
109           Here, we examined various COVID-19 epidemiological data for signatures of  
110 autorepression (i.e., negative feedback) using population mobility data as a correlate of the contact  
111 rate. Analysis of the early epidemic (i.e., spring 2020) showed a counterintuitive time-dependent  
112 inversion of the correlation between COVID-19 deaths and population mobility across different  
113 epidemiological scales (96 countries, 50 states, and 562 counties). This inversion was consistent  
114 with autorepression but not with alternate epidemiological mechanisms. Independent lines of  
115 evidence for behavioral autorepression were established by assaying for signatures of  
116 autorepression in the dynamics of COVID-19 infection. Fluctuation analysis of daily infection  
117 counts showed direct evidence of significantly altered epidemic feedback strength. Analysis of  
118 the first wave of COVID-19 infections showed that the timing of waves was positively correlated  
119 with wave intensity, consistent with variation in autorepression delay. Based on these data

120 indicating the existence of behavioral autorepression, we applied behavioral autorepression to SIR-  
121 type models and found that autorepression dramatically improved the mortality forecasting of  
122 these models.

123

124

## 125 RESULTS

126

### 127 *Epidemiological data show unexpected inversion of the mobility-death correlation*

128 To search for potential signatures of population-level behavioral autorepression, we  
129 examined temporal changes in population-level mobility (a correlate of contact rate) early in the  
130 pandemic on a region-by-region basis, relative to longitudinal COVID-19 mortality data. To avoid  
131 infection underreporting, we focused on confirmed COVID-19 deaths as the measure for disease  
132 transmission (20), and to quantify changes in population-level behavior, we used mobile phone  
133 geolocation data from Google’s mobility dataset (21), where location data is broken down into  
134 occupancy of different location classes: (i) retail & recreation occupancy, (ii) grocery & pharmacy  
135 occupancy, (iii) park occupancy, (iv) transit occupancy, (v) workplace occupancy, and (vi)  
136 residential occupancy. We hypothesized that residential occupancy likely represents the inverse  
137 aggregate of all the other mobility measures, so our initial analyses focused on residential  
138 occupancy as a surrogate for occupancy changes in multiple categories of public spaces (i–v),  
139 whereas subsequent analyses directly analyzed these other mobility measures.

140

141 Using linear regression, we examined two aspects of occupancy: (i) the change in  
142 occupancy from baseline after a threshold of ten deaths had been crossed (termed “*initial change*  
143 *in residential occupancy*”); and (ii) the maximum change in residential occupancy during the first  
144 wave of COVID-19 infection (termed “*maximum change in residential occupancy*”), which  
145 typically occurred around thirty days after the ten-death threshold was crossed in a region. To  
146 examine the relationship between mobility and mortality during the first wave of COVID-19, both  
147 occupancy metrics (i.e., initial and max changes) were compared to COVID-19 deaths during the  
148 first wave on a region-to-region basis (**Fig. 1**). Regression analysis was performed at three different  
149 geographic scales—from coarse-grained to finer-grained: (i) international (96 countries); (ii)  
150 provincial (50 US states); and (iii) regional (562 US counties). As expected, regression analysis

151 of the coarse-grained data of 96 countries revealed that initial changes in residential occupancy  
152 were negatively correlated with deaths per capita (**Fig. 1A**, left). However, the maximum change  
153 in residential occupancy appeared counterintuitively inverted, showing a positive correlation with  
154 regional mortality (**Fig. 1A**, right). To ensure that this observed inversion of the correlation was  
155 not an artifact of coarse-grained geographical analysis, we repeated the analysis at the provincial  
156 and regional level. These finer-grained analyses of states and counties in the United States showed  
157 very similar inversion of the mobility-death correlation (**Fig. 1B–C**).

Figure 1: Temporal inversion of the mobility-death correlation

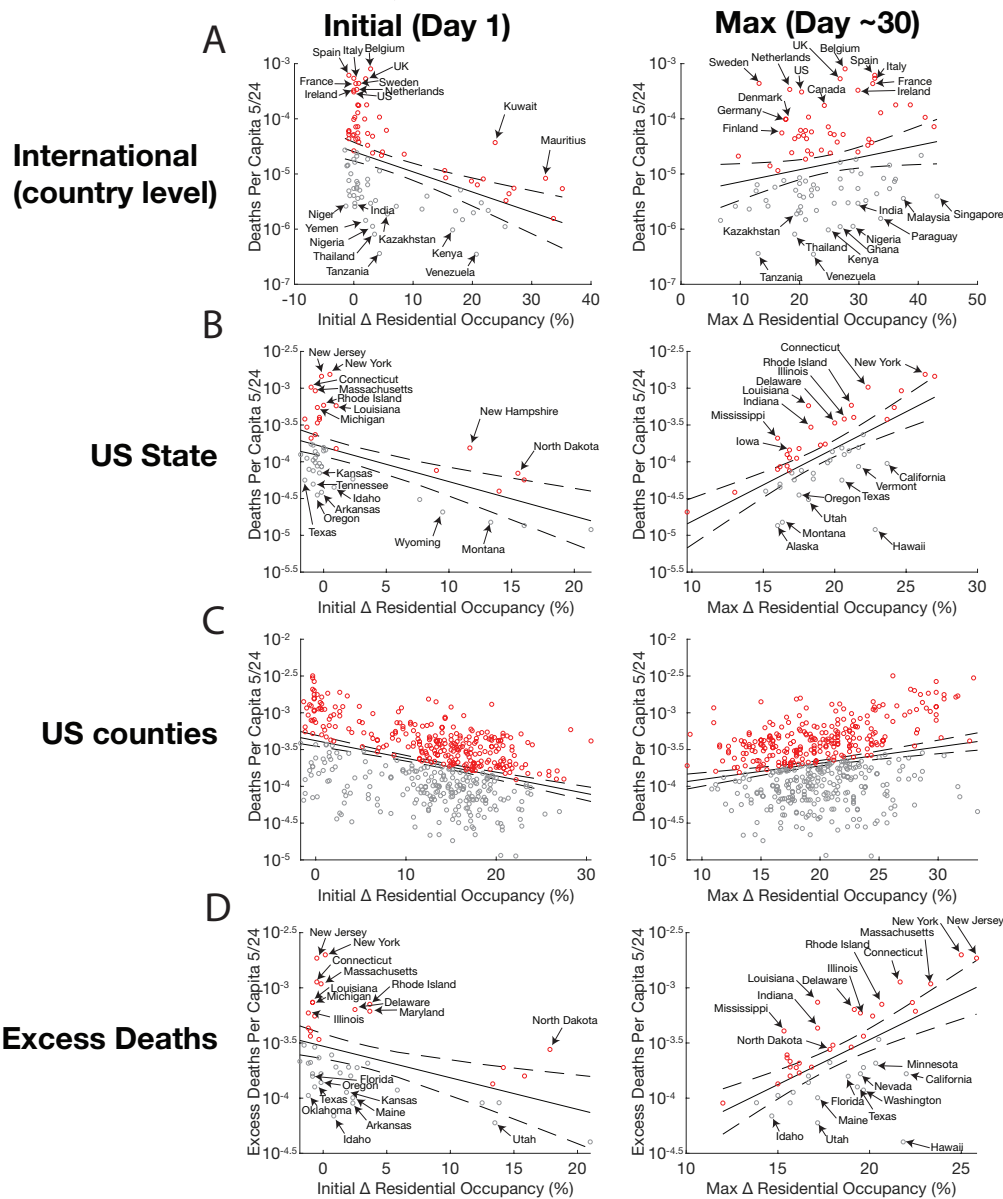

158

**Fig. 1: Temporal inversion of the mobility-death correlation early in the COVID-19 outbreak.** COVID-19 deaths per capita vs. population mobility (as measured by residential occupancy) from mobile-phone data. Initial and max  $\Delta$  occupancy is defined as deviation from baseline occupancy at the start of the epidemic, defined as 10 deaths (left, day 1) or the maximum deviation from baseline occupancy (right, day ~30), respectively; deaths per capita are totaled until May 24<sup>th</sup>, 2020. Solid lines are the linear regression, dashed lines are 95% confidence intervals. Red points represent regions that had higher death than predicted by the regression. Grey points represent regions that had lower death than predicted by the regression. (A) Data of international of COVID-19 deaths vs. initial change in residential occupancy (Left; regression p-value= $6.7 \times 10^{-6}$ ) and max. increase in residential occupancy (Right; regression p-value= $3.2 \times 10^{-2}$ ). (B) US-state COVID-19 deaths vs. initial change in residential occupancy (Left, regression p= $2.7 \times 10^{-5}$ ) and max. increase in residential occupancy (Right; regression p-value= $1.9 \times 10^{-7}$ ). (C) US county COVID-19 deaths versus initial change in residential occupancy (Left; regression p-value= $8.2 \times 10^{-19}$ ) and max. increase in residential occupancy (Right; regression p-value= $1.9 \times 10^{-7}$ ). (D) Excess deaths (US state) vs. initial change in residential occupancy (Left; regression p-value= $1.7 \times 10^{-3}$ ) and max. change in residential occupancy (Right; regression p-value= $1.8 \times 10^{-6}$ ). P-values indicate significance that the slope of the regression line is non-zero (null hypothesis slope=0).

159 To eliminate the possibility that incomplete death statistics (22) might generate a spurious  
160 mobility-death correlation, we repeated the regression analysis using excess deaths instead of  
161 confirmed COVID-19 deaths. Estimates of excess deaths associated with COVID-19 from the  
162 CDC were calculated by comparing mortality rates during the COVID-19 pandemic to average  
163 mortality statistics from previous years (23-25). Despite using excess deaths, the inverted  
164 correlation between initial and maximum residential occupancy persisted (**Fig. 1D**). Excess deaths  
165 also showed an inverted correlation between initial and maximum change in retail, transit, and  
166 workplace occupancy (**Fig. S1**). These results suggest that the inversion of the mobility-death  
167 correlation is not caused by an incomplete characterization of COVID-19 mortality (**Fig. 1D, Fig.**  
168 **S1**).

169  
170 To verify that the observed inversion of the mobility-death correlation was not an artifact  
171 of the particular mobility metric used (i.e., residential occupancy), we analyzed mortality data  
172 versus the five other mobility categories. These other metrics represent occupancy of public spaces  
173 which decreased during the first wave of COVID-19 (as opposed to residential occupancy, which  
174 increased during the first wave of COVID-19). Retail & recreation, transit, and workplace  
175 occupancy all exhibited temporal inversion of the mortality-death correlation (**Fig. S2-S6**).  
176 Overall, alternate measures of mobility showed a similar temporal inversion of the mobility-death  
177 correlation.

178  
179 We additionally tested that the inversion of the mobility-death correlation was retained  
180 with alternative regression methods and alternative sources for mobility data (Supp Text-Section  
181 1). In all cases, the inversion of the mobility-death correlation was found to be a robust  
182 phenomenon that occurred across multiple geographic scales, irrespective of data source or  
183 underlying statistical assumptions (**Fig. S7-S10**).

### 184 185 ***Minimal autorepression models explain inversion of the mobility-death correlation***

186 Building off the prior finding that population-level mobility affects contact rate (26), these  
187 empirical data (**Fig. 1**) showing inversion of the mobility-death correlation suggested that contact  
188 rate might be dynamically regulated. To test this hypothesis, we developed a series of simplified  
189 Susceptible-Infective-Recovered-Deceased (SIRD) models to determine if instantaneous changes



190 in contact rate and/or a dynamically changing contact rate (e.g., behavioral autorepression) could  
 191 account for the observed inversion of the mobility-death correlation. Specifically, we modeled  
 192 reductions in contact rates between individuals due to residential sequestration.  
 193

Figure 2: Autorepression coupled with sequestration is sufficient to account for inversion of mobility-death correlation

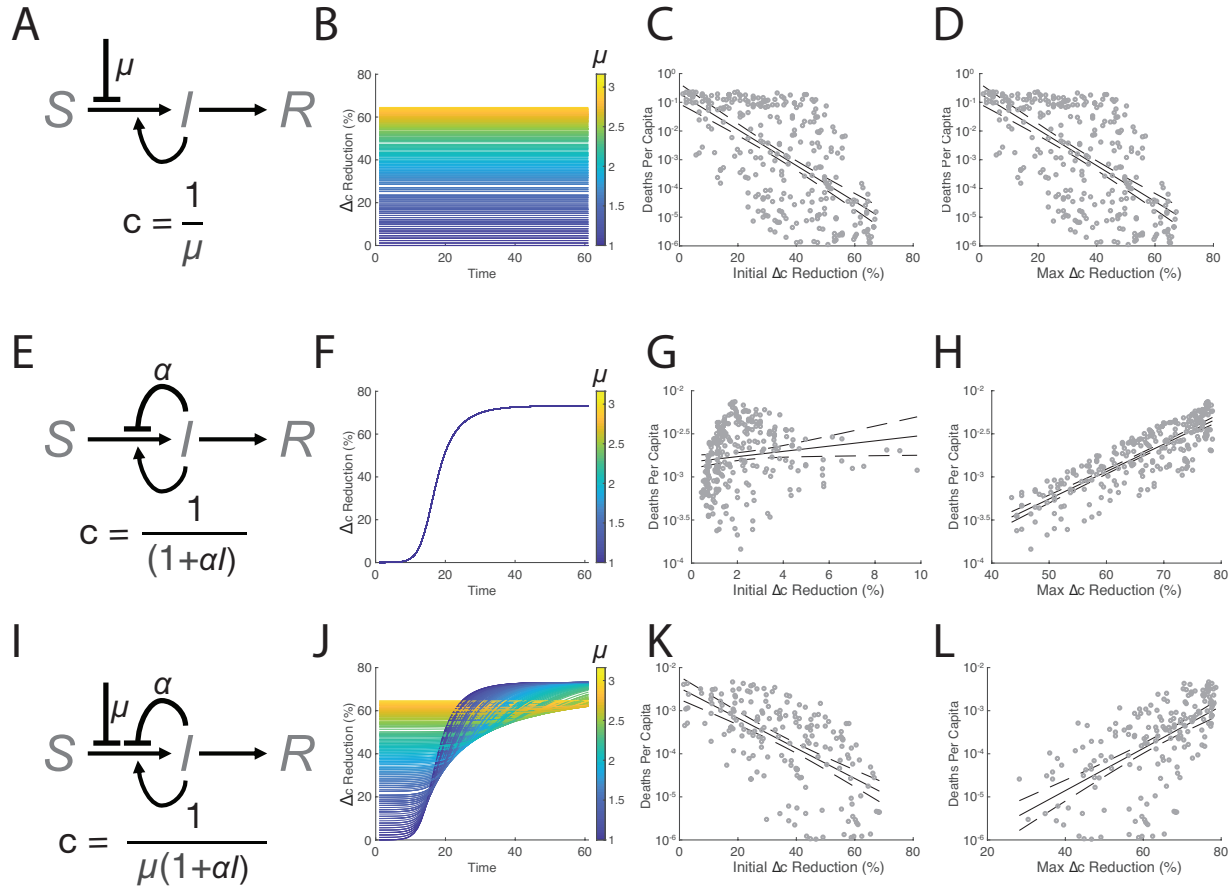

194

**Fig. 2: Autorepression coupled with sequestration is sufficient to account for temporal inversion of mobility-death correlation.** (A) Schematic of the simple SIRD model [Eqs. 1-4] with extrinsic (e.g., policy based) sequestration ( $\mu$ ) [Eq. 5] where contact-reduction rate  $c = 1/\mu$ . (B) Change in contact rate over time for simple SIRD (shown as % reduction). (C-D) Numerical simulations of mortality (calculated as 1% of  $R/N$ ) as a function of initial and max changes in contact rate (% reduction) from simple SIRD model (regression p-values= $1.6 \times 10^{-32}$  and  $1.6 \times 10^{-32}$ ). (E) SIRD model with autorepression ( $\alpha$ ) [Eq. 6] where contact-reduction rate is  $c = 1/(1+\alpha I)$ . (F) Change in contact rate over time (% reduction) for SIRD autorepression model. (G-H) Mortality as a function of initial and max changes in contact rate (% reduction) from SIRD autorepression model (p-values= $3.7 \times 10^{-2}$  &  $9.6 \times 10^{-69}$ , respectively). (I) SIRD model with coupled sequestration and autorepression [Eq. 7] where contact-reduction rate  $c = 1/\mu(1+\alpha I)$  (J). Change in contact rate over time for coupled SIRD extrinsic sequestration-autorepression model. (K-L) Mortality as a function of initial and max changes in contact rate (% reduction) for SIRD sequestration-autorepression model (regression p-values =  $3.8 \times 10^{-20}$  and  $7.0 \times 10^{-20}$ , respectively). P-values indicate significance that the slope of the regression line is non-zero (null hypothesis slope=0).

195

196

197 All SIRD models we utilize are based upon the same basic set of equations:

198

199 
$$\frac{dS}{dt} = -\frac{\beta cSI}{N} \quad \text{Eq. 1}$$

200 
$$\frac{dI}{dt} = \frac{\beta cSI}{N} - \gamma I - \varepsilon I \quad \text{Eq. 2}$$

201 
$$\frac{dR}{dt} = \gamma I \quad \text{Eq. 3}$$

202 
$$\frac{dD}{dt} = \varepsilon I \quad \text{Eq. 4}$$

203

204 where S, I, R, and D represent susceptible, infectious, recovered, and deceased individuals in a  
205 population of N total individuals;  $\beta$  is the transmission rate constant ( $\text{days}^{-1}$ ),  $\gamma$  is the removal rate  
206 of infective individuals ( $\text{days}^{-1}$ ),  $c$  is the effective contact rate used to calculate “contact-reduction”  
207 in our models, and  $\varepsilon$  is the proportion of cases that result in death. The Susceptible-Infective-  
208 Recovered-Deceased (SIRD) model structure we chose was based on previous literature which  
209 expresses the death rate as a proportion of the number of infected individuals (27, 28). The  
210 different models we considered (below) differ only in the functional form of their contact rate.

211

212 The simplest SIRD model we considered (**Fig. 2A**) describes an extrinsically induced sequestration  
213 of individuals (e.g., government-mandated ‘lockdowns’) where the  $c$  is:

214

215 
$$c = \frac{1}{\mu} \quad \text{Eq. 5}$$

216

217 and  $\mu$  is a constant that represents the efficacy of external forces (i.e., mandates) in facilitating the  
218 sequestration of healthy individuals (unitless). This initial model describes arguably the simplest  
219 constant reduction in contact rate (**Fig. 2B**). In this model, both initial and maximum reductions  
220 in contact rate reduced the number of calculated deaths (**Fig. 2C,D**), i.e., were negatively correlated  
221 with mortality, and could not reproduce the empirically observed inversion (**Fig. 1**).

222

223 Since this simple model [**Eqs. 1-5**] uses a fixed change in contact rate, to more closely  
224 mimic real-world scenarios of increases in strength of public-health mandates over time (29, 30),  
225 we also tested a variant of this model where induced sequestration was delayed and implemented

226 at a time  $\tau$  partway through the epidemic (i.e., a step function where  $c=1$  if  $\text{time}<\tau$  and  $c=1/\mu$  if  
227  $\text{time}\geq\tau$ ). However, systems where induced sequestration was delayed still produced contact rate  
228 reductions that were negatively correlated with death (**Fig. S11**). Thus, a reduction in contact rate  
229 can only explain part of the correlation data (i.e., initial changes in residential occupancy and  
230 COVID-19 deaths), but not the temporal inversion of the correlation.

231

232 The second SIRD model (**Fig. 2E**) implements behavioral autorepression (i.e., negative  
233 feedback) by modifying the contact rate such that it reduces proportionally to the number of  
234 infectious cases:

235

$$236 \quad c = \frac{1}{1 + \alpha I} \quad \text{Eq. 6}$$

237

238 with  $\alpha$  (person<sup>-1</sup>) representing the strength of the contact-rate reduction based on the number of  
239 infective individuals (a.k.a., the negative-feedback ‘gain’).

240

241 In this autorepression model [**Eqs. 1-4,6**], reductions in contact rate are solely driven by behavioral  
242 autorepression, such that residential occupancy increases in response to the number of infective  
243 individuals (**Fig. 2F**). The autorepression model generated a weak positive correlation between  
244 death and initial contact-rate reductions (**Fig. 2G**), but a strong positive correlation between deaths  
245 and maximum contact rate reductions (**Fig. 2H**). Thus, behavioral autorepression can also only  
246 explain a portion of the data—the correlation between deaths and maximum changes in residential  
247 occupancy—but not the negative correlation between death and initial increases in residential  
248 occupancy (**Fig. 2G,H**).

249

250 Based on these two sets of results each explaining a portion of the data, we constructed a  
251 third SIRD model combining both extrinsic sequestration and behavioral autorepression (**Fig. 2I**)  
252 with contact rate:

253

$$254 \quad c = \frac{1}{\mu(1 + \alpha I)} \quad \text{Eq. 7}$$

255 with all state variables and parameters as described above.

256

257 This combinatorial model [Eqs. 1-4,7] showed that regions with the weakest extrinsic (induced)  
258 sequestration  $\mu$  (i.e., the least initial change in contact rate) generated the most infective individuals  
259 (as expected), but this ultimately resulted a larger contact-rate reduction later in time (Fig. 2J).  
260 Conversely, regions with the strongest extrinsic sequestration  $\mu$  (i.e., the highest initial contact-  
261 rate reduction) generated the fewest infections, resulting in the lowest peak contact-rate reduction  
262 (Fig. 2J). This dynamic change in the effective contact rate was sufficient to generate a temporal  
263 inversion of the correlation between calculated deaths and contact-rate reduction (Fig. 2K-L),  
264 where mortality is negatively correlated with early contact rate reductions (Fig. 2K), but positively  
265 correlated with maximum contact-rate reductions (Fig. 2L). Overall, the simulations show that  
266 behavioral autorepression coupled with extrinsic (induced) sequestration is sufficient to  
267 recapitulate the inversion of the mobility-death correlation.

268

269 To test if a coincidental increase between residential occupancy and COVID-19 cases  
270 could have caused the inversion of the mobility-death correlation, we simulated a scenario where  
271 changes in residential occupancy did not reduce contact rates, but found this scenario could not  
272 cause the temporal inversion (Supp Text- Section 2), arguing that a functional dependency, not a  
273 coincidental increase, between contact rate and infection is required (Fig. S12).

274

275 To test alternate hypotheses that could account for the inversion of the mobility-death  
276 correlation, we considered the possibilities that intense lockdowns drove infection, or that deaths  
277 (rather than infections) drove changes in behavior (Supp Text- Section 3). However, neither  
278 alternate hypothesis was parsimonious with the epidemiological data (Fig. S13-S14).

279

280

### 281 *Fluctuation analysis reveals signature and strength of autorepression*

282 To verify the existence of negative feedback in these early COVID-19 epidemiological  
283 dynamics and quantify the feedback strength, we exploited a known phenomenon where negative  
284 feedback typically reduces the magnitude of fluctuations in a system, proportional to the feedback  
285 strength (31-33). To search for this effect, we analyzed variance in daily COVID-19 infection

286 data over time using a common metric; the normalized variance (i.e., square of the standard  
287 deviation divided by the mean, also known as the ‘Fano factor’) of daily infections.

288

289 First, a stochastic SIR model (**Table S1**) was used to benchmark the analysis, with Monte-  
290 Carlo simulations (34) used to examine how behavioral autorepression (**Fig. 3A**) affected the  
291 normalized variance of the daily infection rate in the model. As expected, models incorporating  
292 autorepression showed a marked reduction in the Fano factor versus mean infections per day (**Fig.**  
293 **3B**). Specifically, the analysis indicated that incorporating autorepression in an SIR model causes  
294 the slope of the Fano to decrease.

295

296 Next, we quantified the reduction in the empirical Fano of the COVID-19 infection data  
297 by least-squares linear regression for daily infections early in the epidemic internationally (**Fig.**  
298 **3C**) and in the United States (**Fig. 3D**). The slope of the Fano-vs-mean relationship in these  
299 datasets was found to be  $\sim 0.6$ , consistent with autorepression (**Fig. 3C,D**).

300

301 To quantify the negative-feedback strength (a.k.a., negative ‘gain’) of behavioral  
302 autorepression, we generated a series of simulated slopes from models with incrementally stronger  
303 autorepression (**Fig. 3E**). As the simulated strength of autorepression increased, the Fano-versus-  
304 mean slope decreased, and extrapolation to the fit US state and country data estimated the  
305 autorepression gain for the COVID-19 pandemic at  $5 \times 10^{-5} \text{ person}^{-1}$  (**Fig. 3E**). An autorepression  
306 gain of  $5 \times 10^{-5} \text{ person}^{-1}$  indicates that when the level of infection reaches two thousand  
307 simultaneously infective individuals, the transmission rate constant in that outbreak will be  
308 decreased by 10%.

309

310 While the decreasing Fano-versus-mean slope could in principle be accounted for by  
311 mechanisms other than autorepression (e.g., policy changes that reduce transmission rate), the  
312 modeling results above (**Fig. 2, Fig S.11**) suggest that a feedback mechanism is the most  
313 parsimonious with the data. Moreover, analysis of early changes in policy (35) were found to be  
314 positively correlated with infection count (**Fig. S15**), suggesting policy itself may play a role in  
315 behavioral autorepression.

316

317           To test if pre-emptive, policy-mediated modification of the transmission rate constant  
318 could account for infection-rate variability, we analyzed simulations where the transmission rate  
319 constant was varied (**Fig. S16**). Changing the transmission rate constant could increase the Fano-  
320 vs-mean slope above 1, but could not reduce the Fano-vs-mean slope below 1, again supporting  
321 the finding that a reduction in the Fano slope is a signature of autorepression (**Fig. 3, Fig. S16**).  
322 Notably, quantification of the Fano-vs-mean relationship over the first 15 days of infection at the  
323 international (**Fig. S17A**) and US state (**Fig. S17B**) scale also yielded slopes below 1. Since  
324 COVID-19 mortality occurs ~20 days after exposure to SARS-CoV-2 (36), these results suggest a  
325 substantial fraction of variation in infection counts is suppressed by infection-induced  
326 autorepression independently of death-induced autorepression.

327

328

329

330

Figure 3: Variability in infection rate can be used to verify autorepression and calculate its strength

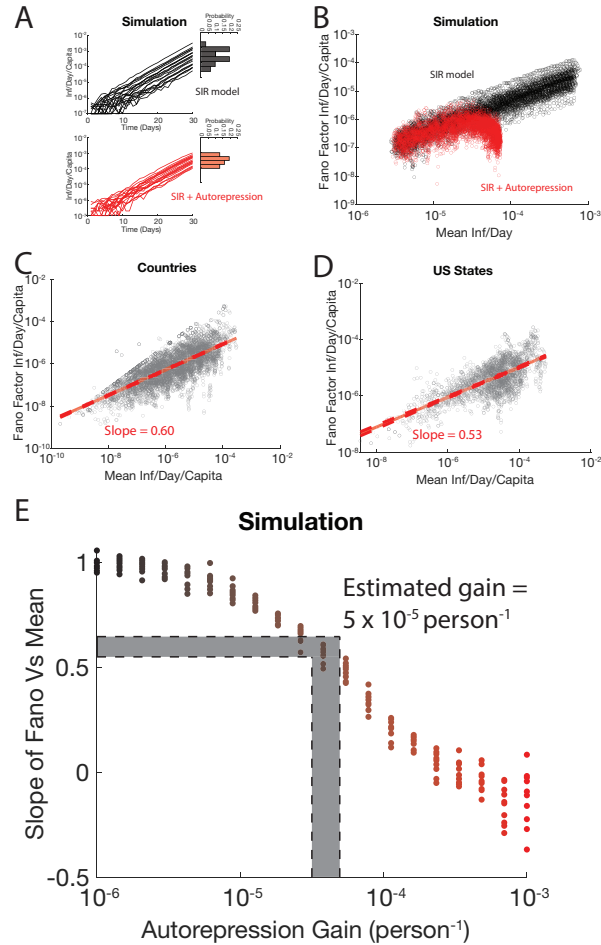

331

332

**Figure 3: Variability in infection rate can be used to verify autorepression and calculate its strength.** (A) Representative Monte-Carlo simulations of infection rate (infections per day) over time in a stochastic SIR model without autorepression (black) and with autorepression (red). Histograms show the variability in infections per day at day 30. (B) Fano factor (variance normalized to mean) of infections rate versus mean generated by Monte-Carlo simulations of an SIR model with (red) and without (black) autorepression. (C) Data of Fano factor versus mean of the first 60 days of infection for countries affected by COVID-19. Slope of linear regression = 0.6 (dashed red lines represent 95% confidence interval). (D) Fano factor versus mean plot of the first 60 days of infection for US states affected by COVID-19. Linear regression slope = 0.53 (dashed red lines represent 95% confidence interval). (E) Effect of autorepression strength on slope of the Fano factor vs mean. The slopes calculated from state and country data correspond to an autorepression gain of approximately  $5 \times 10^{-5} \text{ person}^{-1}$ . Shaded area represents mean vs. Fano slope and corresponding autorepression gain range determined by measurements at the international and US state scale.

333 ***Temporal analysis of infection waves indicates presence of autorepression***

334 To establish an independent line of evidence for behavioral autorepression, we  
 335 qualitatively analyzed the dynamics and temporal characteristics of the initial ‘wave’ of COVID-  
 336 19 infection in different regions. Specifically, we analyzed if the wave pattern (i.e., magnitude  
 337 and timing of infection waves) was consistent with a traditional SIR model [Eqs. 1–4] or whether

338 incorporating delayed autorepression [Eq. S2] was more parsimonious with the data (Fig. S18A,  
339 Supp Text- Section 4).

340  
341 The SIR model [Eqs. 1–4] naturally produces an initial wave, or peak in infections per day,  
342 and we first benchmarked how modulating the infection rate ( $\beta$ ) affected this wave (Fig. S18B).  
343 As expected, increased infectivity generated earlier and larger peaks in infections per day (Fig.  
344 S18C), producing a trend where earlier waves peaked at higher levels and later waves peaked at  
345 lower levels. Similarly, when a fixed time delay ( $\tau$ ) was incorporated between the susceptible and  
346 infective populations (Fig. S18D, Eqs. S3-S6), increasing this delay generated a similar trend  
347 where infection waves peaked later and at lower peak magnitudes (Fig. S18E).

348  
349 In contrast, when behavioral autorepression (Fig. S18F, Eq. S2) was incorporated, a starkly  
350 different trend emerged: increasing the delay time generated stronger waves that peaked later but  
351 at *higher* magnitudes (Fig. S18G). This observation held true for a range of different parameter  
352 values.

353  
354 To compare these model trends to the empirical data, we calculated timing of COVID-19  
355 infection waves (i.e., days from a region’s epidemic onset to its first peak in infections/day), and  
356 compared it to the magnitude of that region’s first wave. The data at both the international and  
357 US-state scales showed an increasing trend (i.e., positive correlation) between the magnitude and  
358 the timing of the peak with larger peaks occurring at later times (Fig. S18H & S18I; p-value:  $2 \times 10^{-3}$   
359 &  $2 \times 10^{-9}$  respectively). Overall, these data appear qualitatively consistent with autorepression  
360 and suggest that temporal delays in autorepression vary across different locations.

361  
362  
363

### 364 *Impacts of behavioral autorepression on epidemic forecasting*

365 To determine the impact of behavioral autorepression on epidemic forecasting, we  
366 mirrored previous forecasting approaches (37), using the first 60 days of reported US COVID-19  
367 deaths to predict the subsequent outbreak trajectory using either a canonical SIRD model [Eq. 8-  
368 11] or a behavioral autorepression SIRD model with autorepression gain determined from the first



369 60 days of data [Eq. 12-15]. The equation sets used are analogs of Eqs. 1–4 (with Eq. 5 and 7  
370 respectively), and are as follows, for the canonical SIRD model:

371

$$372 \quad \frac{dS}{dt} = -\frac{\beta SI}{N} \quad \text{Eq. 8}$$

$$373 \quad \frac{dI}{dt} = \frac{\beta S_{t-\tau_1} I_{t-\tau_1}}{N} - \gamma I - \varepsilon I_{t-\tau_2} \quad \text{Eq. 9}$$

$$374 \quad \frac{dR}{dt} = \gamma I \quad \text{Eq. 10}$$

$$375 \quad \frac{dD}{dt} = \varepsilon I_{t-\tau_2} \quad \text{Eq. 11}$$

376

377 and, as follows, for the autorepression model:

378

$$379 \quad \frac{dS}{dt} = -\frac{\beta SI}{N} \frac{1}{1 + \alpha I_{t-\tau_3}} \quad \text{Eq. 12}$$

$$380 \quad \frac{dI}{dt} = \frac{\beta S_{t-\tau_1} I_{t-\tau_1}}{N} \frac{1}{1 + \alpha I_{t-\tau_3}} - \gamma I - \varepsilon I_{t-\tau_2} \quad \text{Eq. 13}$$

$$381 \quad \frac{dR}{dt} = \gamma I \quad \text{Eq. 14}$$

$$382 \quad \frac{dD}{dt} = \varepsilon I_{t-\tau_2} \quad \text{Eq. 15}$$

383

384 with  $\tau_1$  (days) representing the time it takes for a susceptible individual exposed to SARS-CoV-2  
385 to become infectious, with  $\tau_2$  (days) representing the delay between an individual becoming  
386 infectious and that individual dying from COVID-19, and  $\tau_3$  (days) representing the time it takes  
387 an increase in COVID-19 cases to cause susceptible individuals to self-sequester and mediate  
388 autorepression. All other state variables and parameters as described above.

389

390 Each model (either Eqs. 8–11 or Eqs. 12–15) was “trained” on the first 60 days of data on  
391 COVID-19 deaths in the US using nonlinear least squares regression analysis and simulations, and  
392 then extended out to 120 days for prediction. As previously reported (37), the SIRD model [Eqs.  
393 8–11] forecasted  $\sim 10^6$  COVID-19 deaths within the first 120 days of the epidemic, whereas the  
394 reported COVID-19 deaths were substantially lower in this time period. In contrast, the  
395 autorepression model [Eqs. 12–15] generated forecasts of deaths over 120 days that appeared far  
396 more parsimonious fits with the data than the simple SIRD model forecast (Fig. 4A). To

397 quantitatively compare the goodness of fit between the two models, the Akaike Information  
398 Criterion (AIC) metric was used (38), and the SIRD forecast had a significantly poorer score than  
399 the autorepression model (AIC = 145 vs -322; Wilcoxon rank sum test, p-value: 0). Since lower AIC  
400 represents a better fit, these results demonstrate that inclusion of behavioral autorepression in  
401 epidemiological model formulation significantly improves the forecasting potential of these  
402 models.

403  
404 The forecasting potential of the behavioral autorepression SIRD model was further verified  
405 using the first sixty days of the omicron wave. Autorepression models forecasted total mortality  
406 with a high degree of accuracy over ~140 days, while SIRD models generated forecasts that  
407 severely underpredicted mortality, displaying a significantly poorer AIC score (**Fig. 4B** AIC = -  
408 398 vs -978, Wilcoxon rank sum test, p-value: 0). These results further support the utility of  
409 epidemiological models incorporating behavioral autorepression, and suggest that these models  
410 could be used to make health policy decisions early on during a pandemic.

411  
412 To determine the impact of behavioral autorepression on the efficacy of non-  
413 pharmaceutical interventions (NPIs), a series of NPIs were simulated. To obtain realistic  
414 parameters for these simulations, autorepression models were fitted to infections per day from all  
415 50 states. These fitted parameters were then used to run data-driven simulations of NPIs that  
416 reduced the SARS-CoV-2 transmission rate constant by 0–25% (i.e., the range of mobility changes  
417 empirically measured during the first wave of the pandemic, see Fig 1). As the NPI efficacy metric,  
418 we used number of deaths averted. The simulations showed that while two regions may have  
419 similar mortality totals, the effectiveness of intervention differs widely depending on the  
420 autorepression gain of an individual region ( $\alpha$  between  $4.1 \times 10^{-6}$  and  $.32 \text{ person}^{-1}$ ). Simulations  
421 of regions where autorepression is weak (example fit in **Fig. 4C** inset) had dramatic responses to  
422 early NPIs, represented in the graph by simulations that show an ~4 log-fold decrease in deaths in  
423 response to a NPI that decreases transmission by 25% (**Fig. 4C** light grey line). Over the same  
424 range of NPI strengths, simulations of regions where autorepression is strong had ~1 log-fold  
425 reduction in death (**Fig. 4C** dark grey line). Late implementations of the same NPIs yielded an ~3  
426 log-fold decrease in deaths in regions when autorepression is weak and < 0.5 log-fold decrease in  
427 regions when autorepression is strong (**Fig. 4D**, example fit in **Fig. 4D** inset). These results predict

428 that NPIs are less effective in regions with high autorepression gains. Suppression of variation is  
429 a well-known phenomenon in autorepression systems, caused by their capacity to self-regulate  
430 (31, 32, 39). These results suggest that autorepression models could be used to forecast the efficacy  
431 of NPIs in a region-specific manner.

432

433

434

435

436

437

438

439

440

441

442

443

444

445

446

447

448

449

450

451

452

453

Figure 4: Autorepression models significantly improve COVID-19 forecasting

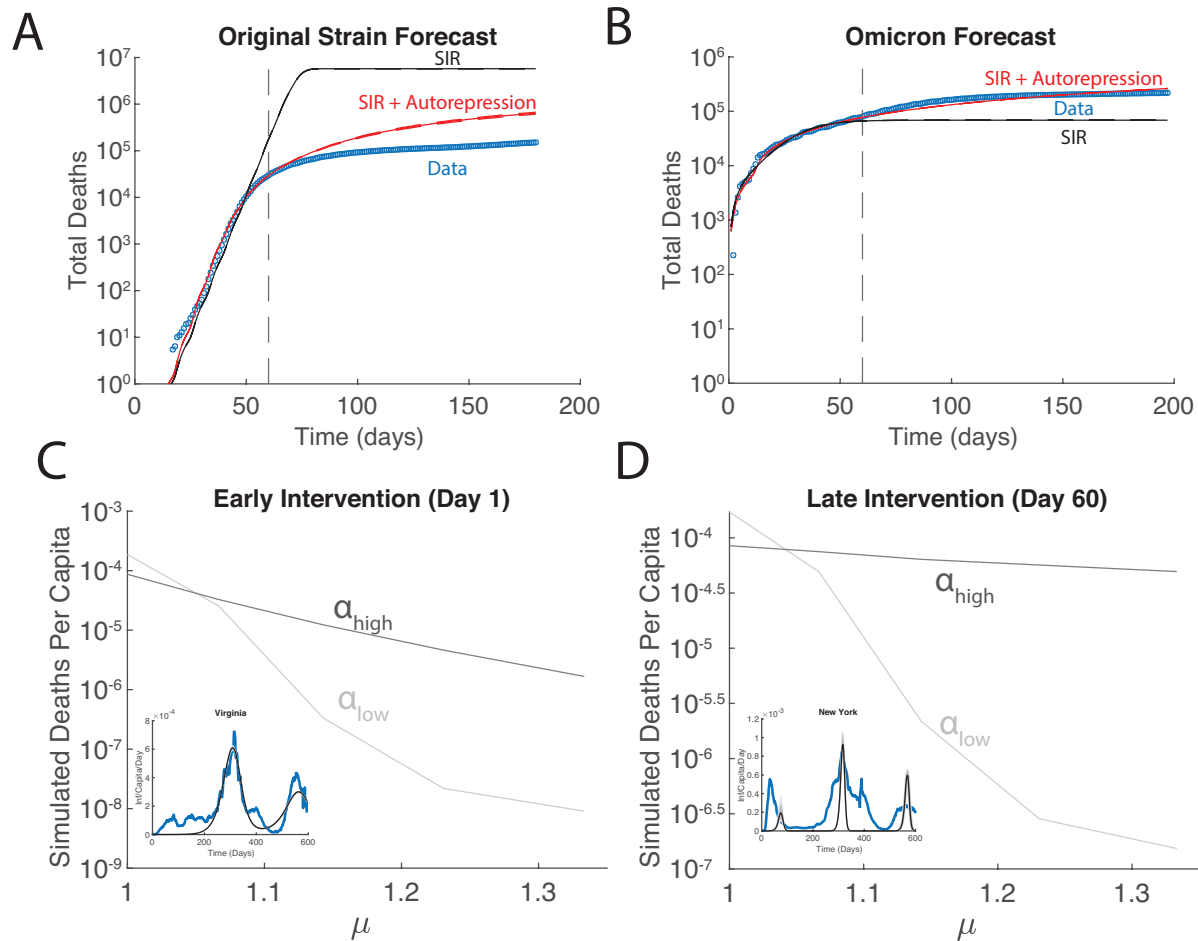

454

**Figure 4: Autorepression models significantly improve COVID-19 forecasting.** (A) Mortality forecasts of COVID-19 deaths in first 180 days after the COVID-19 pandemic initiation in the US. COVID-19 mortality data (blue), forecasted death from the standard SIRD model (black) and forecasted death from SIRD-autorepression model (red) showing that autorepression model forecasts are more accurate than canonical SIRD model forecasts (SIR AIC=145 vs. AIC=-322 for SIR-autorepression) (B) Mortality forecasts of COVID-19 deaths after Omicron variant outbreak (first 200 days) in the US. COVID-19 mortality data (blue), forecasted death from the standard SIR model (black) and forecasted death from SIRD-autorepression model (red) showing that autorepression model forecasts are more accurate than canonical SIR model forecasts (SIRD AIC=-398 vs. AIC=-978 for SIR-autorepression) (C) Forecasted efficacy of non-pharmaceutical intervention (lockdowns) when initiated early in the epidemic for varying changes in extrinsic (e.g., policy based) sequestration ( $\mu$ ) under scenarios of low or high autorepression strength (alpha). Mortality totals were simulated based on fits to COVID-19 infection dynamics. Intervention strength based on mobility changes from Fig. 1. Light grey- weak fitted autorepression gain, dark grey- strong fitted autorepression gain. Insets show examples of fitting, blue represents smoothed infections per day, black line represents averaged dynamics from autorepression model, grey shading represents 99% confidence interval. (D) Forecasted efficiency of non-pharmaceutical intervention initiated late in epidemic (day 60) under scenarios of low-vs.-high autorepression strength (alpha).

455

456

457

458

## 459 DISCUSSION

460 This study presents multiple pieces of evidence supporting the presence of negative-  
461 feedback dynamics (i.e., behavioral autorepression) during the early stages of the COVID-19  
462 pandemic. Simulations using minimal models demonstrated that behavioral autorepression is  
463 sufficient to explain a statistically significant inversion of the correlation between residential  
464 occupancy and COVID-19 mortality over time that was consistently observed across  
465 epidemiological scales (**Figs. 1–2**). Second, fluctuation analyses of SARS-CoV-2 daily infection  
466 data was consistent with autorepression’s ability to reduce the magnitude of fluctuations and  
467 enabled estimation of the negative-feedback strength for the COVID-19 pandemic at  $5 \times 10^{-5}$   
468  $\text{person}^{-1}$  (**Fig. 3**). This value indicates that when the level of infection reaches two thousand  
469 simultaneously infective individuals, the transmission rate constant in that outbreak will be  
470 decreased by 10%. Importantly, the majority of the reduction in fluctuations was observed during  
471 very early times (i.e.,  $\leq 15$  days; **Fig. S16**), indicating that while death-mediated autorepression  
472 (27) may exist, infection-mediated autorepression had an independent, substantial impact on  
473 SARS-CoV-2 infection dynamics. Third, temporal analysis of the first wave of infection revealed  
474 that variation between peak timings and intensities is parsimonious with autorepression delay  
475 rather than regional variation in infectivity (**Fig. S17**). Taken together, these analyses provide  
476 independent lines of evidence for the impact of behavioral autorepression on SARS-CoV-2  
477 transmission and indicate that the inclusion of autorepression in models can significantly improve  
478 epidemiological forecasting and may affect the efficiency of certain NPIs (**Fig. 4**).

479  
480 Interestingly, the behavioral autorepression model indicates that mobility, in particular  
481 residential occupancy, is unlikely to be an independent variable, at least early during an outbreak.  
482 Rather, the models indicate that mobility measurements, a surrogate of contact rate, are in fact an  
483 ensemble variable influenced by extrinsic factors (e.g., public-health mandates) as well as dynamic  
484 individual factors (e.g., risk-taking). Several studies have reported on the efficacy of early  
485 lockdowns (40–42), corroborating the observation that initial changes in residential occupancy are  
486 negatively correlated with regional mortality. The results presented here also help account for the  
487 previously-unexplained observation that early lockdowns were more effective than late lockdowns  
488 (41, 42), since the models argue that mobility changes induced by late lockdowns become  
489 overwhelmed by collective decisions to self-sequester in response to infection reports.

490  
491  
492  
493  
494  
495  
496  
497  
498  
499  
500  
501  
502  
503  
504  
505  
506  
507  
508  
509  
510  
511  
512  
513  
514  
515  
516  
517  
518  
519  
520

Perhaps the most utilitarian impacts of the presence of behavioral autorepression are its effects on the fidelity of epidemic forecasting and the efficiency of NPIs. The COVID-19 pandemic highlighted substantial variation in epidemiological forecasts (37, 43), likely due to numerous factors including unknown parameter estimates, assumptions about efficacy of NPIs, and model structure. This study demonstrates that SIR models incorporating behavioral autorepression can generate less variable forecasts, and that the behavioral autorepression phenomenon may aid in judicious application of NPIs. The finding that autorepression affects NPI efficacy suggests that measuring local variation in autorepression strength could allow NPIs to be tailored to individual regions, assuming that autorepression strength is intrinsic to a population and does not substantially change over time or between outbreaks, which will require further study (see discussion below). Since autorepression is often correlated with oscillation (9, 13, 14, 27), future models could, in principle, accurately forecast the timing of waves of COVID-19 infection.

Future work concerning behavioral autorepression during outbreaks of infectious disease should address the consistency of autorepression parameters within outbreaks and between different outbreaks. Our study treated autorepression as constant during the course of the COVID-19 pandemic to identify the minimum conditions sufficient to explain the changes in correlation, variability, and timing observed in infection trajectories. However, it is possible that as public understanding of COVID-19 evolved, autorepression strength changed. This work similarly does not investigate whether previous pandemics experienced similar levels of autorepression. However, since behavioral autorepression was originally hypothesized to explain saturation of cholera infection rate (2) rather than SARS-CoV-2, it seems possible that autorepression is an intrinsic property of human populations experiencing an outbreak rather than a property of the pathogen driving an outbreak. Therefore, analysis of autorepression during the COVID-19 pandemic could serve as a guide to studying autorepression and its consequences in future pandemics.

## 521 METHODS

### 522 *Linear regression analysis*

523 Linear regressions were performed in MATLAB using the fitlm function. Linear regressions were  
524 performed using changes in residential occupancy to explain regional variation in confirmed  
525 COVID-19 deaths (20). Changes in residential occupancy were measured using the Google  
526 COVID-19 Community Mobility Reports (21). COVID-19 death totals on 05/24/2020 were  
527 compared to the change in occupancy from baseline after a threshold of ten deaths had been crossed  
528 (termed “*initial change in residential occupancy*”) and the maximum change in residential  
529 occupancy during the first wave of COVID-19 infection (termed “*maximum change in residential*  
530 *occupancy*”). 05/24/2020 was chosen as the cutoff date for quantifying COVID-19 deaths, in part,  
531 in order to avoid confounding deaths during the first wave of infection with deaths from subsequent  
532 waves. COVID-19 death totals were Log transformed prior to regression and regression analysis  
533 performed at three different geographic scales based on available data, including: international  
534 countries; US states, and US counties. Unless specifically noted, linear models only have one  
535 independent variable and one dependent variable. Multi-factor linear models have their individual  
536 independent variables listed in their corresponding figure legends.

537

### 538 *ODE simulations of policy- vs. feedback-controlled epidemics*

539 Nonlinear ordinary differential equations were numerically solved in MATLAB using ode15s.  
540 Initial parameters were randomly generated from empirically chosen ranges that produced >1  
541 infection but infected <50% of the population in sixty days. Two hundred distinct parameter sets  
542 were simulated to represent a set of different regions with unique epidemiological parameters.  
543 Percentage reduction from initial contact rates to contact rates at time t were calculated via **Eq. 16**:

$$544 \quad \% \Delta c \text{ Reduction} = \left(1 - \frac{1}{c_t}\right) \times 100 \quad \text{Eq. 16}$$

545 where  $c_t$  corresponds to the contact rate at time t. Each simulated region was analyzed to find the  
546 early change in contact rates and the maximum change in contact rates. The early change in contact  
547 rates ( $c_e$ ) was calculated via **Eq. 17**:

$$548 \quad \text{Early } \% \Delta c \text{ Reduction} = \left(1 - \frac{1}{c_e}\right) \times 100 \quad \text{Eq. 17}$$

549 where  $c_e$  corresponds to the contact rate when a threshold of ten deaths was reached. The  
550 maximum change in contact rates ( $c_m$ ), was calculated using **Eq. 18**:

551 
$$\text{Max \% } \Delta c \text{ Reduction} = \left(1 - \frac{1}{c_m}\right) \times 100 \quad \text{Eq. 18}$$

552 where  $c_m$  corresponds to the maximum change in contact rate over the course of the simulation.

553 These percentage changes in contact rates were used to calculate a linear regression between  
554  $\Delta c$  and simulated deaths using the same procedure as Methods- Linear regression analysis. When  
555 policy was implemented partway through the simulation, it was treated as a step change in the  
556 mandate variable  $\mu$  that occurred after thirty days of simulation.

557

#### 558 *Monte Carlo simulation of infections per day*

559 A Monte Carlo algorithm for MATLAB was used (<https://github.com/nvictus/Gillespie>) to  
560 implement a stochastic SIR model. Simulations were run over a sixty-day time period. Simulation  
561 parameters were empirically determined to match the first sixty days of infection dynamics from  
562 countries and US states. The variance and mean of individual infection-per-day trajectories were  
563 measured along seven-day moving time windows. In each window, the variance was divided by  
564 the mean to calculate the Fano factor (i.e., variance normalized by mean) for infections per day.

565

#### 566 *Perturbation analysis of SIRD versus autorepression models*

567 Randomized parameter sets were generated from an empirically-defined range chosen to maximize  
568 simulated epidemics that produced  $>1$  infection but infected  $<50\%$  of the population in sixty days.  
569 Epidemics were simulated for 3,650 days ( $\sim 10$  years) to ensure that infections per day reached a  
570 peak during the simulation time. Simulated epidemics that failed to generate more  $>1$  infection or  
571 infected  $>50\%$  of the population in sixty days were excluded from the analysis, whereas  
572 simulations that generated  $>1$  infection and infected  $<50\%$  of the population in sixty days were  
573 marked for analysis. Simulated epidemics marked for analysis were analyzed for their wave  
574 dynamics by using the findpeaks function in MATLAB. The time until the first peak in infections  
575 per day and the number of infections on that day were quantified.

576

#### 577 *Fitting and forecasting COVID-19 mortality dynamics*

578 MCMC fitting was performed in MATLAB (<https://github.com/mjlaine/mcmstat>) using  
579 confirmed COVID-19 deaths in the United States for first 60 days after the first US COVID-19  
580 infection was recorded. Hand fitting was used to initialize parameters before MCMC fitting. Sum  
581 of squared error was used to optimize the fit within the algorithm. Four independent fits were



582 performed, with 10,000 iterations per fit. The parameter set from best fit out of the four  
583 independent runs over the initial 60-day time period was used to forecast mortality totals over the  
584 next 120 days (a total simulation time of 180 days). Confidence interval projections and Akaike  
585 Information Criterion (AIC) scores were calculated using the ODE values generated by parameter  
586 sets from the final 1000 iterations in the MCMC fitting process. AIC scores were calculated using  
587 **Eq. 19**:

$$588 \quad AIC = n * \ln\left(\frac{RSS}{n}\right) + 2K \quad \text{Eq. 19}$$

589 where  $n$  is the number of data points used in the fitting, RSS is the residual sum of squares, and  $K$   
590 is the number of fitted parameters.

591 Individual AIC scores were generated for each of the final 1000 iterations, then averaged to  
592 represent the AIC score of a fit.

593

#### 594 *Fitting daily COVID-19 infection dynamics*

595 MCMC fitting was performed in MATLAB (<https://github.com/mjlaine/mcmstat>) using daily  
596 counts of confirmed COVID-19 infections at the international or US state level from the first day  
597 an infection was recorded in a given region until October 26<sup>th</sup>, 2021. Hand fitting was used to  
598 initialize parameters before MCMC fitting. **Eqs. 1-4** and **Eq. S2** were used to generated simulated  
599 infections per day, which was compared to real infections per day. Sum of squared error was used  
600 to optimize the fit within the algorithm. 60 independent fits were performed per state with 10,000  
601 iterations per fit. The best fit was chosen by the average AIC (calculated using **Eq. 19**) of the final  
602 1000 iterations for each state.

603

#### 604 *Forecasting intervention efficacy*

605 Epidemic dynamics were simulated using a modified Euler method for SDE simulation where  
606 infective individuals exerted delayed autorepression on epidemic growth. Parameters were taken  
607 from the converged fits of the delayed behavioral autorepression model for infection dynamics in  
608 all fifty US states. Simulations represented one year of mortality dynamics. Interventions that  
609 statically decreased the transmission rate constant ( $\beta$ ) were applied at day 1 or day 60 to represent  
610 early and late interventions respectively.

611

612

613 **AKCNOWLEDGEMENTS**

614 We thank Katie Claiborn for editing, Rob Rodick for discussions on the effect of population  
615 density on the spread of COVID-19, and Brad Pollock for guidance on statistical methods. This  
616 work was supported by NIH grant R37AI109593.

617

618

619

620

621

622

623

624

625

626

627

628

629

630

631

632

633

634

635

636

637

638

639

640

641

642

643

644 **References**

- 645 1. W. O. Kermack, A. G. McKendrick, A contribution to the mathematical theory of  
646 epidemics. *Proceedings of the royal society of london. Series A, Containing*  
647 *papers of a mathematical and physical character* **115**, 700-721 (1927).
- 648 2. V. Capasso, S. Paveri-Fontana, A mathematical model for the 1973 cholera  
649 epidemic in the European Mediterranean region. *Revue d'épidémiologie et de*  
650 *Santé Publique* **27**, 121-132 (1979).
- 651 3. V. Capasso, G. Serio, A generalization of the Kermack-McKendrick deterministic  
652 epidemic model. *Mathematical biosciences* **42**, 43-61 (1978).
- 653 4. N. L. Komarova, A. Azizi, D. Wodarz, Network models and the interpretation of  
654 prolonged infection plateaus in the COVID19 pandemic. *Epidemics* **35**, 100463  
655 (2021).
- 656 5. H. Berestycki, B. Desjardins, B. Heintz, J.-M. Oury, Plateaus, rebounds and the  
657 effects of individual behaviours in epidemics. *Scientific reports* **11**, 1-12 (2021).
- 658 6. A. V. Tkachenko *et al.*, Time-dependent heterogeneity leads to transient  
659 suppression of the COVID-19 epidemic, not herd immunity. *Proceedings of the*  
660 *National Academy of Sciences* **118**, e2015972118 (2021).
- 661 7. A. V. Tkachenko *et al.*, Stochastic social behavior coupled to COVID-19  
662 dynamics leads to waves, plateaus, and an endemic state. *Elife* **10**, e68341  
663 (2021).
- 664 8. J. Cui, Y. Sun, H. Zhu, The impact of media on the control of infectious diseases.  
665 *Journal of dynamics and differential equations* **20**, 31-53 (2008).
- 666 9. J. M. Epstein, J. Parker, D. Cummings, R. A. Hammond, Coupled contagion  
667 dynamics of fear and disease: mathematical and computational explorations.  
668 *PloS one* **3**, e3955 (2008).
- 669 10. R. J. Hatchett, C. E. Mecher, M. Lipsitch, Public health interventions and  
670 epidemic intensity during the 1918 influenza pandemic. *Proceedings of the*  
671 *National Academy of Sciences* **104**, 7582-7587 (2007).
- 672 11. S. Collinson, J. M. Heffernan, Modelling the effects of media during an influenza  
673 epidemic. *BMC public health* **14**, 1-10 (2014).
- 674 12. S. Collinson, K. Khan, J. M. Heffernan, The effects of media reports on disease  
675 spread and important public health measurements. *PloS one* **10**, e0141423  
676 (2015).
- 677 13. L. Kim, S. M. Fast, N. Markuzon, Incorporating media data into a model of  
678 infectious disease transmission. *PloS one* **14**, e0197646 (2019).
- 679 14. J. M. Epstein, E. Hatna, J. Crodelle, Triple contagion: a two-fears epidemic  
680 model. *Journal of the Royal Society Interface* **18**, 20210186 (2021).
- 681 15. J. Sheng, J. Amankwah-Amoah, Z. Khan, X. Wang, COVID-19 pandemic in the  
682 new era of big data analytics: Methodological innovations and future research  
683 directions. *British Journal of Management* **32**, 1164-1183 (2021).
- 684 16. G. E. Patterson, K. M. McIntyre, H. E. Clough, J. Rushton, Societal impacts of  
685 pandemics: comparing COVID-19 with history to focus our response. *Frontiers in*  
686 *public health* **9** (2021).
- 687 17. N. Oliver *et al.* (2020) Mobile phone data for informing public health actions  
688 across the COVID-19 pandemic life cycle. (American Association for the  
689 Advancement of Science), p eabc0764.

- 690 18. A. Wesolowski *et al.*, Quantifying the impact of human mobility on malaria.  
691 *Science* **338**, 267-270 (2012).
- 692 19. K. H. Grantz *et al.*, The use of mobile phone data to inform analysis of COVID-19  
693 pandemic epidemiology. *Nature communications* **11**, 1-8 (2020).
- 694 20. E. Dong, H. Du, L. Gardner, An interactive web-based dashboard to track  
695 COVID-19 in real time. *The Lancet infectious diseases* **20**, 533-534 (2020).
- 696 21. Google-LLC.
- 697 22. H. Wang *et al.*, Estimating excess mortality due to the COVID-19 pandemic: a  
698 systematic analysis of COVID-19-related mortality, 2020–21. *The Lancet* (2022).
- 699 23. A. Noufaily *et al.*, An improved algorithm for outbreak detection in multiple  
700 surveillance systems. *Statistics in medicine* **32**, 1206-1222 (2013).
- 701 24. S. Maëlle, S. Dirk, H. Michael, Monitoring count time series in R: Aberration  
702 detection in public health surveillance. *arXiv preprint arXiv:1411.1292* (2014).
- 703 25. H. Rue, S. Martino, N. Chopin, Approximate Bayesian inference for latent  
704 Gaussian models by using integrated nested Laplace approximations. *Journal of*  
705 *the royal statistical society: Series b (statistical methodology)* **71**, 319-392 (2009).
- 706 26. C. I. Jarvis *et al.*, Quantifying the impact of physical distance measures on the  
707 transmission of COVID-19 in the UK. *BMC medicine* **18**, 1-10 (2020).
- 708 27. J. S. Weitz, S. W. Park, C. Eksin, J. Dushoff, Awareness-driven behavior  
709 changes can shift the shape of epidemics away from peaks and toward plateaus,  
710 shoulders, and oscillations. *Proceedings of the National Academy of Sciences*  
711 **117**, 32764-32771 (2020).
- 712 28. S. Moore, E. M. Hill, M. J. Tildesley, L. Dyson, M. J. Keeling, Vaccination and  
713 non-pharmaceutical interventions for COVID-19: a mathematical modelling study.  
714 *The Lancet Infectious Diseases* **21**, 793-802 (2021).
- 715 29. T. Hale *et al.*, Variation in government responses to COVID-19. (2020).
- 716 30. T. Hale *et al.*, Variation in US states responses to COVID-19. *Blavatnik School of*  
717 *Government* (2020).
- 718 31. M. Thattai, A. Van Oudenaarden, Intrinsic noise in gene regulatory networks.  
719 *Proceedings of the National Academy of Sciences* **98**, 8614-8619 (2001).
- 720 32. M. L. Simpson, C. D. Cox, G. S. Saylor, Frequency domain analysis of noise in  
721 autoregulated gene circuits. *Proceedings of the National Academy of Sciences*  
722 **100**, 4551-4556 (2003).
- 723 33. R. C. Yu *et al.*, Negative feedback that improves information transmission in  
724 yeast signalling. *Nature* **456**, 755-761 (2008).
- 725 34. D. T. Gillespie, Exact stochastic simulation of coupled chemical reactions. *The*  
726 *journal of physical chemistry* **81**, 2340-2361 (1977).
- 727 35. T. Hale *et al.*, A global panel database of pandemic policies (Oxford COVID-19  
728 Government Response Tracker). *Nature human behaviour* **5**, 529-538 (2021).
- 729 36. R. Challen, E. Brooks-Pollock, K. Tsaneva-Atanasova, L. Danon, Meta-analysis  
730 of the severe acute respiratory syndrome coronavirus 2 serial intervals and the  
731 impact of parameter uncertainty on the coronavirus disease 2019 reproduction  
732 number. *Statistical Methods in Medical Research* **31**, 1686-1703 (2022).
- 733 37. N. Ferguson *et al.*, Report 9: Impact of non-pharmaceutical interventions (NPIs)  
734 to reduce COVID19 mortality and healthcare demand. (2020).

- 735 38. H. Akaike, A new look at the statistical model identification. *IEEE transactions on*  
736 *automatic control* **19**, 716-723 (1974).
- 737 39. D. Nevozhay, R. M. Adams, K. F. Murphy, K. i. Josić, G. Balázs, Negative  
738 autoregulation linearizes the dose–response and suppresses the heterogeneity  
739 of gene expression. *Proceedings of the National Academy of Sciences* **106**,  
740 5123-5128 (2009).
- 741 40. H. S. Badr *et al.*, Association between mobility patterns and COVID-19  
742 transmission in the USA: a mathematical modelling study. *The Lancet Infectious*  
743 *Diseases* **20**, 1247-1254 (2020).
- 744 41. R. Chaudhry, G. Dranitsaris, T. Mubashir, J. Bartoszko, S. Riazi, A country level  
745 analysis measuring the impact of government actions, country preparedness and  
746 socioeconomic factors on COVID-19 mortality and related health outcomes.  
747 *EClinicalMedicine* **25**, 100464 (2020).
- 748 42. P. Nouvellet *et al.*, Reduction in mobility and COVID-19 transmission. *Nature*  
749 *communications* **12**, 1-9 (2021).
- 750 43. J. P. Ioannidis, S. Cripps, M. A. Tanner, Forecasting for COVID-19 has failed.  
751 *International journal of forecasting* (2020).
- 752 44. D. A. Belsley, E. Kuh, R. E. Welsch, *Regression diagnostics: Identifying*  
753 *influential data and sources of collinearity* (John Wiley & Sons, 2005).
- 754 45. L. M. Verbrugge, R. B. Taylor, Consequences of population density and size.  
755 *Urban Affairs Quarterly* **16**, 135-160 (1980).
- 756 46. B. Rader *et al.*, Crowding and the shape of COVID-19 epidemics. *Nature*  
757 *medicine* **26**, 1829-1834 (2020).
- 758 47. C. a. Apple, Mobility trends reports. CDC and Apple.
- 759 48. H. Lei, X. Xu, S. Xiao, X. Wu, Y. Shu, Household transmission of COVID-19-a  
760 systematic review and meta-analysis. *Journal of Infection* **81**, 979-997 (2020).
- 761 49. A. Nande, B. Adlam, J. Sheen, M. Z. Levy, A. L. Hill, Dynamics of COVID-19  
762 under social distancing measures are driven by transmission network structure.  
763 *PLoS computational biology* **17**, e1008684 (2021).
- 764 50. U. S. Census, (2020).
- 765
- 766
- 767
- 768
- 769
- 770
- 771
- 772
- 773
- 774
- 775

776 **SUPPLEMENTARY TEXT**

777 **Section 1: Verifying robustness of mobility-death inversion**

778 To determine if potential covariation between the early and maximum mobility metric  
779 could account for the inversion of the mobility-death correlation, we used linear regression models  
780 that account for the simultaneous effect of population, initial residential occupancy, and maximum  
781 residential occupancy on death (44). These multi-factor regressions recorded the same negative  
782 correlation between death and initial residential occupancy and the same positive correlation  
783 between death and maximum residential occupancy (**Fig. S7A-B**). Thus, the inversion of the  
784 mobility-death correlation does not appear to be dependent on covariance between population and  
785 mobility or covariance between mobility metrics (**Fig. S7A-C**).

786  
787 Since regional population size is known to be correlated with density (45) and SARS-CoV-  
788 2 transmission is known to be density-dependent (46), we next asked if a (nonlinear) quadratic  
789 relationship between population size and death rates could account for the inversion of the  
790 mobility-death correlation. Models assuming a quadratic dependence between population size and  
791 death also fit well (**Fig. S8A**), but the death residuals still exhibited an inversion of the correlation  
792 between initial and maximum residential occupancy (**Fig. S8B-C**). Thus, models that account for  
793 the nonlinear relationship between population size and deaths further support the inversion of the  
794 mobility-death correlation.

795  
796 To ensure that the inversion of the mobility-death correlation was not unique to Google  
797 mobility data, we repeated the analyses using an alternate population mobility dataset (47) that  
798 used aggregated navigation data from Apple Maps. Single-factor linear regressions between  
799 mobility and death showed the expected correlation between initial change in mobility and death  
800 (**Fig. S9A**), but did not show the counterintuitive correlation between the maximum change in  
801 mobility and death (**Fig. S9B**). A multifactor linear regression that accounts for covariation  
802 between population, initial change in mobility, maximum change in mobility, and death showed  
803 that the correlation between death and mobility inverts over time (**Fig. S9C-E**). These results  
804 demonstrate that inversion of the mobility-death correlation is not unique to the Google mobility  
805 dataset (**Fig. S9**).

806

807           To confirm that the counterintuitive correlation between maximum change in residential  
808 occupancy and death was robust and not due to a specific instantaneous measure of maximum  
809 mobility, we analyzed cumulative change in mobility. The cumulative changes for most mobility  
810 measures (residential, retail, grocery, transit, and workplace occupancy) showed similar positive  
811 correlation with deaths per capita at all geographic scales (**Fig. S10**), although park occupancy  
812 showed no significant correlation with deaths per capita. Overall, cumulative changes in mobility  
813 appear to exhibit the same correlation with deaths per capita as the maximum instantaneous change  
814 in mobility.

815

816

817

818

819

820

821

822

823

824

825

826

827

828

829

830

831

832

833

834

835

836

837 **Section 2- Coincidental rise in residential occupancy and infections does not cause inversion**  
838 **of the mobility-death correlation**

839 This SIR model simulates outbreaks without repression, representing a scenario where  
840 residential occupancy values are not affected by induced sequestration or autorepression and do  
841 not decrease contact rates amongst the population (**Fig. S12A, Eq. 1-4, Eq. S1**). Residential  
842 occupancy values were randomly drawn from a set of increasing contact rate reduction values (**Fig.**  
843 **S12B**) and compared against epidemics that were simulated without any reduction in transmission.  
844 Neither early nor maximum changes in residential occupancy were correlated with death (**Fig.**  
845 **S12C,D**). These results suggest that coincidental increases in residential occupancy during the  
846 onset of the COVID-19 pandemic are not sufficient to generate the correlations observed in the  
847 analyses performed in this study (**Fig. 1**).

848

849  $c = 1$  Eq. S1

850

851  $c$  represents the effect of contact rate on transmission based on sequestration of healthy individuals  
852 (unitless).

853

854

855

856

857

858

859

860

861

862

863

864

865

866

867



### 868 **Section 3- Investigating hypotheses to explain mobility-death inversion**

869       The correlation between initial changes in residential occupancy and reductions in COVID-  
870 19 mortality (**Fig. 1** 1<sup>st</sup> column) is consistent with previous research showing that fast lockdowns  
871 reduce disease transmission (10, 40, 42). These studies are consistent with the observation that  
872 contact frequencies go down under conditions where residential occupancy increases (26).  
873 However, these studies cannot explain the positive correlation observed between maximum  
874 changes in mobility and COVID-19 deaths (**Fig. 1** 2<sup>nd</sup> column). Therefore, we set out to test  
875 hypotheses that could potentially explain this positive correlation.

876  
877       To test whether lockdown-mediated increases in household contacts led to enhanced  
878 transmission overall, we used US housing density data (proportion of households with > 1.5  
879 occupants/room) to search for a synergistic effect between density and mobility on regional  
880 mortality. Previous works have shown that SARS-CoV-2 transmission is density-dependent (46),  
881 household transmission is a major component of COVID-19 infection (48), and that lockdown-  
882 specific changes in contact patterns can change transmission on a population scale (49). To assess  
883 the impact of household transmission during lockdown, we performed a partial least squares  
884 regression (44) accounting for individual contributions of density, population, initial change in  
885 mobility, maximum change in mobility, and a density-mobility interaction on COVID-19 mortality  
886 totals. The density-mobility interaction term was calculated by multiplying the proportion of  
887 households with > 1.5 occupants/room by the maximum change in residential occupancy. With  
888 this regression approach, we were able to deconvolve the individual effects of density and mobility  
889 from the interaction between the two factors. If transmission of COVID-19 had been increased  
890 through increased occupancy of dense households, the multi-factor regression should reveal a  
891 synergistic interaction between population density, maximum change in residential occupancy,  
892 and COVID-19 deaths. The analysis showed no significant interaction (p-value: 0.25) between  
893 housing density and maximum change in residential occupancy (**Fig. S13**), suggesting that  
894 lockdowns do not exacerbate overall transmission through increased household contacts. Notably,  
895 this lockdown-mediated transmission hypothesis is also difficult to reconcile with the expected  
896 correlation observed between initial changes in mobility and deaths per capita (**Fig. 1**).

897

898 To determine whether the counterintuitive correlation between reduced mobility and  
899 increased COVID-19 deaths could be caused by an inverted causation-correlation relationship (27)  
900 (i.e., that increased death was the driver of reduced local mobility), we examined whether changes  
901 in death were required to change mobility on a region-to-region basis. Analysis of changes in  
902 mobility prior to a single reported death (“pre-death” mobility changes) showed that residential  
903 occupancy typically increased ~10–15% before a single death (**Fig. S14**). Since the maximum  
904 increase in residential occupancy for any region was ~20-30%, these results show that countries,  
905 states, and counties were halfway to peak shutdown before a single local death occurred. This  
906 substantial change in residential occupancy before the onset of death suggests that while COVID-  
907 19 deaths may contribute to changes in population-level behavior, local deaths are unlikely to be  
908 the driving force behind increased residential occupancy. Moreover, this death-mediated-mobility  
909 hypothesis is difficult to reconcile with the expected correlation between initial changes in mobility  
910 and deaths per capita.

911  
912  
913  
914  
915  
916  
917  
918  
919  
920  
921  
922  
923  
924  
925  
926  
927  
928

929 **Section 4- Delayed autorepression is used to analyze infection waves**

930 Delayed autorepression was represented by a change in the contact rate,  $c$ , where:

931 
$$c = \frac{1}{1 + \alpha I_{t-\tau_3}}$$
 Eq. S2

932 with  $\alpha$  (person<sup>-1</sup>) representing the strength of the contact-rate reduction based on the number of  
 933 infective individuals (a.k.a., the negative-feedback ‘gain’) and  $\tau_3$  (days) representing  
 934 autorepression delay.

935

936 Delayed infectivity was represented by the following set of equations:

937

938 
$$\frac{dS}{dt} = -\frac{\beta c S I}{N}$$
 Eq. S3

939 
$$\frac{dI}{dt} = \frac{\beta c S_{t-\tau_1} I_{t-\tau_1}}{N} - \gamma I - \varepsilon I$$
 Eq. S4

940 
$$\frac{dR}{dt} = \gamma I$$
 Eq. S5

941 
$$\frac{dD}{dt} = \varepsilon I$$
 Eq. S6

942

943 where  $S$ ,  $I$ ,  $R$ , and  $D$  represent susceptible, infectious, recovered, and deceased individuals in a  
 944 population of  $N$  total individuals;  $\beta$  is the transmission rate constant (days<sup>-1</sup>),  $\gamma$  is the removal  
 945 rate of infective individuals (days<sup>-1</sup>),  $c$  is the effective contact rate used to calculate “contact-  
 946 reduction” in our models, and  $\varepsilon$  is the proportion of cases that result in death,  $\tau_1$  (days) is the  
 947 time it takes for a susceptible individual exposed to SARS-CoV-2 to become infectious.

948

949

950

951 **Table S1: Reactions for a stochastic model of behavioral autorepression**

| Reaction          | Rate of Reaction                 | Description                                                                                  |
|-------------------|----------------------------------|----------------------------------------------------------------------------------------------|
| $S \rightarrow I$ | $\frac{\beta S I}{1 + \alpha I}$ | Infection of a susceptible individual under autorepression control                           |
| $I \rightarrow R$ | $\gamma I$                       | Removal of individual from infective population when individual recovers or becomes deceased |

952

953 **Supplementary Methods**

954 *Multi-factor regression of interaction between residential occupancy and housing density*

955 Multi-factor linear regressions were performed using fitlm in MATLAB. These regressions were  
956 performed using housing density, population, initial changes in residential occupancy, and  
957 maximum changes in residential occupancy, and the interaction between maximum changes in  
958 residential occupancy and housing density to explain regional variation in confirmed COVID-19  
959 deaths among US counties. Housing density was measured through US census reports on the  
960 proportion of households in a county that had more than 1.5 occupants per room (50). County  
961 populations were also measured using counts from the US census (50). Confirmed COVID-19  
962 death totals on May 24<sup>th</sup>, 2020 were used to quantify pandemic mortality (20). The logarithm of  
963 COVID-19 death totals was taken before analysis.

964 Changes in residential occupancy were measured using the Google COVID-19 Community  
965 Mobility Reports (21). Early changes in occupancy from baseline were quantified by measuring  
966 the change in residential occupancy after a threshold of ten deaths had been crossed (termed “*initial*  
967 *change in residential occupancy*”). Later changes in occupancy from baseline were quantified by  
968 measuring the maximum change in residential occupancy during the first wave of COVID-19  
969 infection (termed “*maximum change in residential occupancy*”). The product of the maximum  
970 change in residential occupancy and housing density on a county-by-county basis represented the  
971 interaction between increased indoor occupancy and density-based transmission. When the  
972 multifactor linear regression corrects for linear contributions of residential occupancy and housing  
973 density, the coefficient and significance of the interaction term represents the strength of a potential  
974 synergistic effect between increased indoor occupancy and density-based transmission.

975

Supplementary Figure 1: Occupancy and excess deaths exhibit correlation inversion

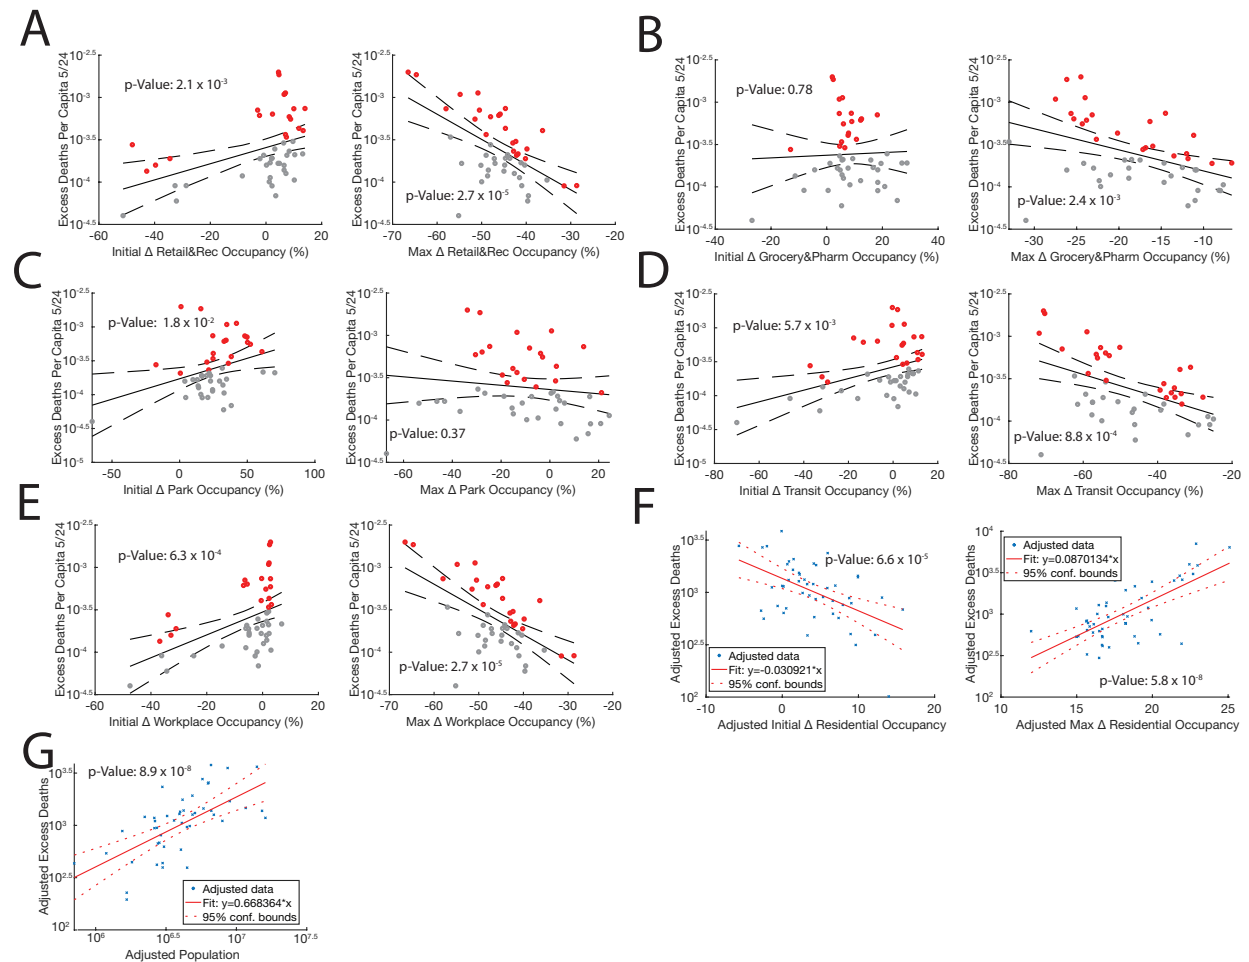

976

977 **Supplementary Figure 1: Occupancy and excess deaths exhibit correlation inversion**

978 A. (1<sup>st</sup> column) Linear regression of the initial change in retail and recreation occupancy versus  
 979 the excess deaths per capita of all states affected by COVID-19.  
 980 (2<sup>nd</sup> column) Linear regression of the maximum change in retail and recreation occupancy versus  
 981 the excess deaths per capita of all states affected by COVID-19.  
 982

983 B. (1<sup>st</sup> column) Linear regression of the initial change in grocery and pharmacy occupancy  
 984 versus the excess deaths per capita of all states affected by COVID-19.  
 985 (2<sup>nd</sup> column) Linear regression of the maximum change in grocery and pharmacy occupancy  
 986 versus the excess deaths per capita of all states affected by COVID-19.  
 987

988 C. (1<sup>st</sup> column) Linear regression of the initial change in park occupancy versus the excess deaths  
 989 per capita of all states affected by COVID-19.  
 990 (2<sup>nd</sup> column) Linear regression of the maximum change in park occupancy versus the excess  
 991 deaths per capita of all states affected by COVID-19.  
 992

993 D. (1<sup>st</sup> column) Linear regression of the initial change in transit occupancy versus the excess  
 994 deaths per capita of all states affected by COVID-19.

995 (2<sup>nd</sup> column) Linear regression of the maximum change in transit occupancy versus the excess  
996 deaths per capita of all states affected by COVID-19.  
997  
998 E. (1<sup>st</sup> column) Linear regression of the initial change in workplace occupancy versus the excess  
999 deaths per capita of all states affected by COVID-19.  
1000 (2<sup>nd</sup> column) Linear regression of the maximum change in workplace occupancy versus the  
1001 excess deaths per capita of all states affected by COVID-19.  
1002  
1003 F. (1<sup>st</sup> column) Multifactor linear regression of initial change in residential occupancy, maximum  
1004 change in residential occupancy, population, and deaths. Partial regression plot of initial change  
1005 in residential occupancy versus excess death.  
1006 (2<sup>nd</sup> column) Multifactor linear regression of maximum change in residential occupancy,  
1007 maximum change in residential occupancy, population, and deaths. Partial regression plot of  
1008 maximum change in residential occupancy versus excess death.  
1009  
1010 G. Multifactor linear regression of initial change in residential occupancy, maximum change in  
1011 residential occupancy, population, and deaths. Partial regression plot of state population versus  
1012 excess death.  
1013  
1014 A-G. Excess deaths are totaled until May 24<sup>th</sup>, 2020. Solid line represents the regression, dashed  
1015 lines represent 95% confidence intervals. Regression p-values below 0.05 are listed in scientific  
1016 notation. Adjusted values are generated based on the co-dependencies of all the variables in the  
1017 model. Red points represent regions that had higher death than predicted by the regression. Grey  
1018 points represent regions that had lower death than predicted by the regression.  
1019  
1020  
1021  
1022  
1023  
1024  
1025  
1026  
1027  
1028  
1029  
1030  
1031  
1032  
1033  
1034  
1035  
1036  
1037  
1038  
1039  
1040

Supplementary Figure 2: Correlation between recreation occupancy and death also inverts over time

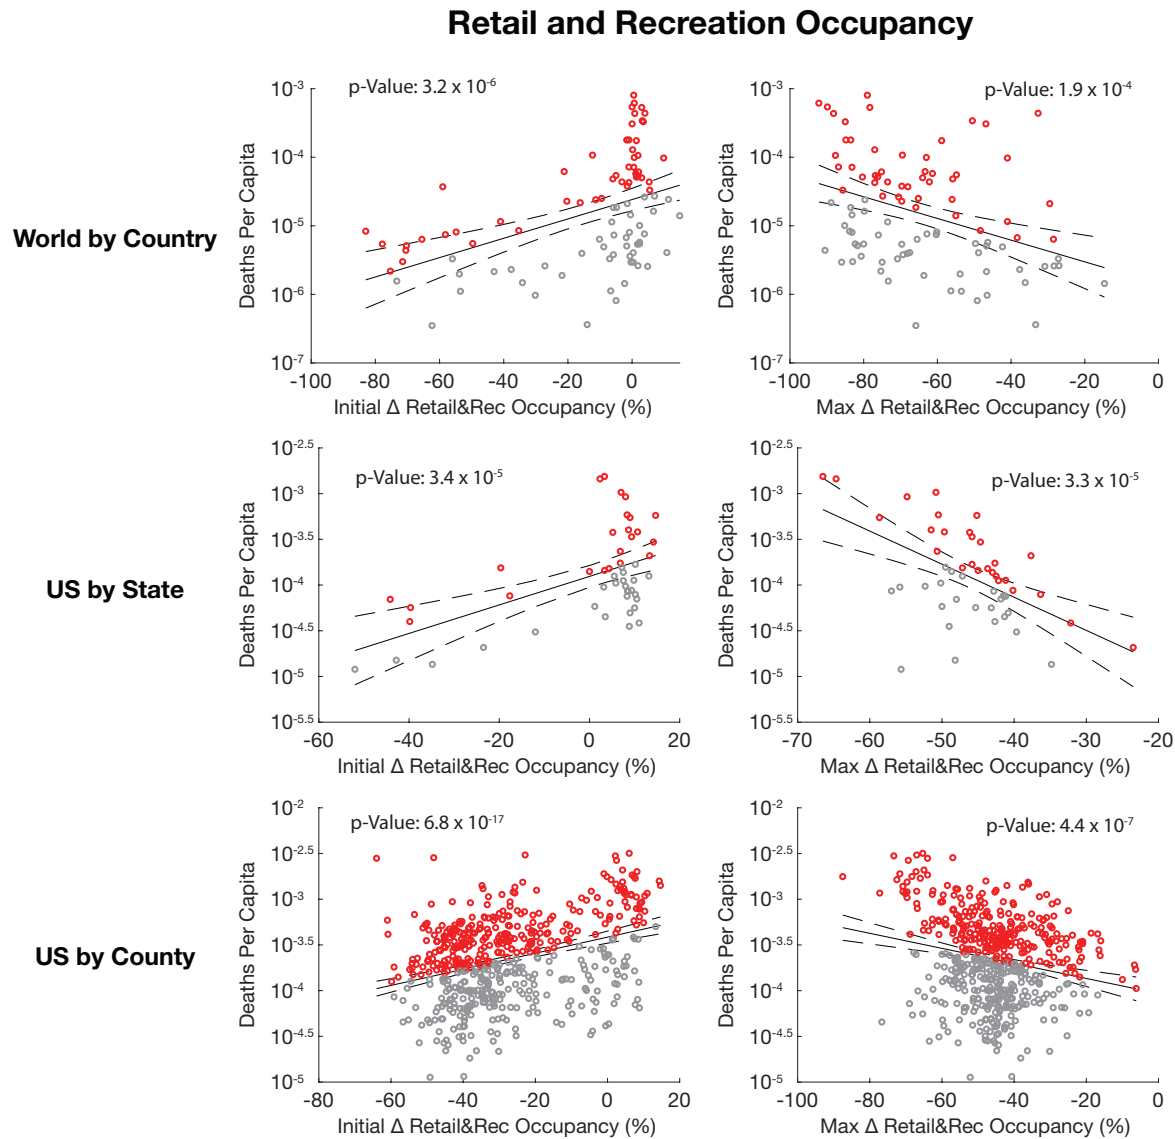

1041  
1042 **Supplementary Figure 2: Correlation between recreation occupancy and death also inverts**  
1043 **over time**

1044 (1<sup>st</sup> column) Linear regressions of the initial change in retail and recreation occupancy versus the  
1045 deaths per capita of all regions affected by COVID-19.

1046 (2<sup>nd</sup> column) Linear regressions of the maximum change in retail and recreation occupancy  
1047 versus the deaths per capita of all regions affected by COVID-19.

1048 Rows represent linear regressions done on countries, states, and counties respectively.

1049  
1050 Deaths per capita are totaled until May 24<sup>th</sup>, 2020. Solid black line represents the linear  
1051 regression, dashed black lines represent 95% confidence intervals. Regression p-values below  
1052 0.05 are listed in scientific notation. Red points represent regions that had higher death than  
1053 predicted by the regression. Grey points represent regions that had lower death than predicted by  
1054 the regression.

Supplementary Figure 3: Correlation between grocery occupancy and death also inverts over time

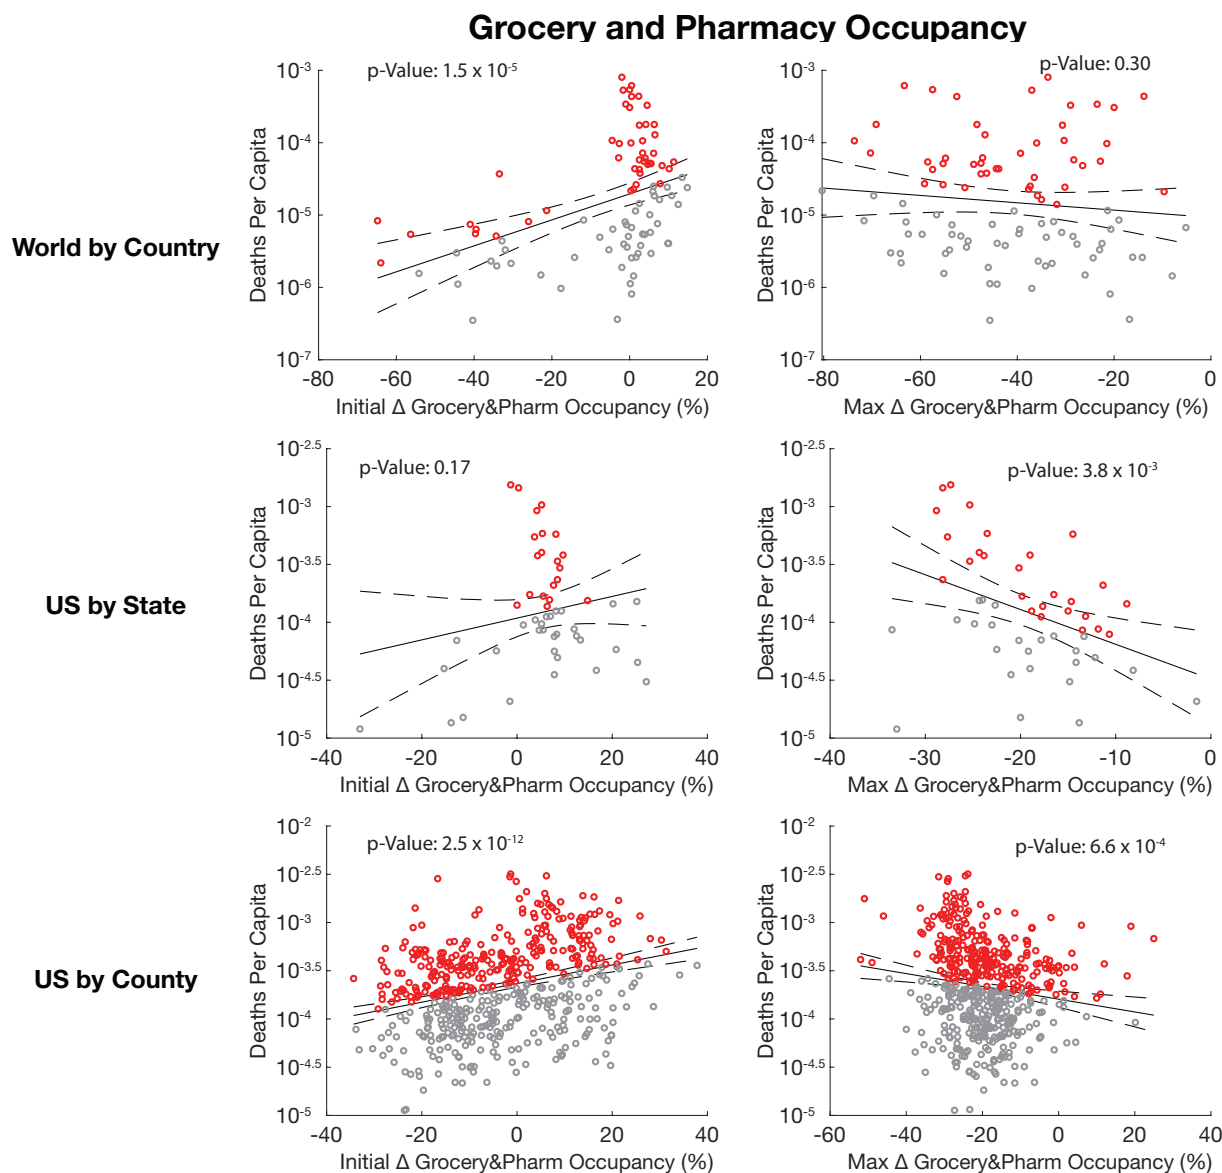

1055

1056 **Supplementary Figure 3: Correlation between grocery occupancy and death also inverts**  
1057 **over time**

1058 (1<sup>st</sup> column) Linear regressions of the initial change in grocery and pharmacy occupancy versus  
1059 the deaths per capita of all regions affected by COVID-19.

1060 (2<sup>nd</sup> column) Linear regressions of the maximum change in grocery and pharmacy occupancy  
1061 versus the deaths per capita of all regions affected by COVID-19.

1062 Rows represent linear regressions done on countries, states, and counties respectively.

1063

1064 Deaths per capita are totaled until May 24<sup>th</sup>, 2020. Solid black line represents the linear  
1065 regression, dashed black lines represent 95% confidence intervals. Regression p-values below  
1066 0.05 are listed in scientific notation. Red points represent regions that had higher death than  
1067 predicted by the regression. Grey points represent regions that had lower death than predicted by  
1068 the regression.



Supplementary Figure 4: Correlation between park occupancy and death does not invert over time

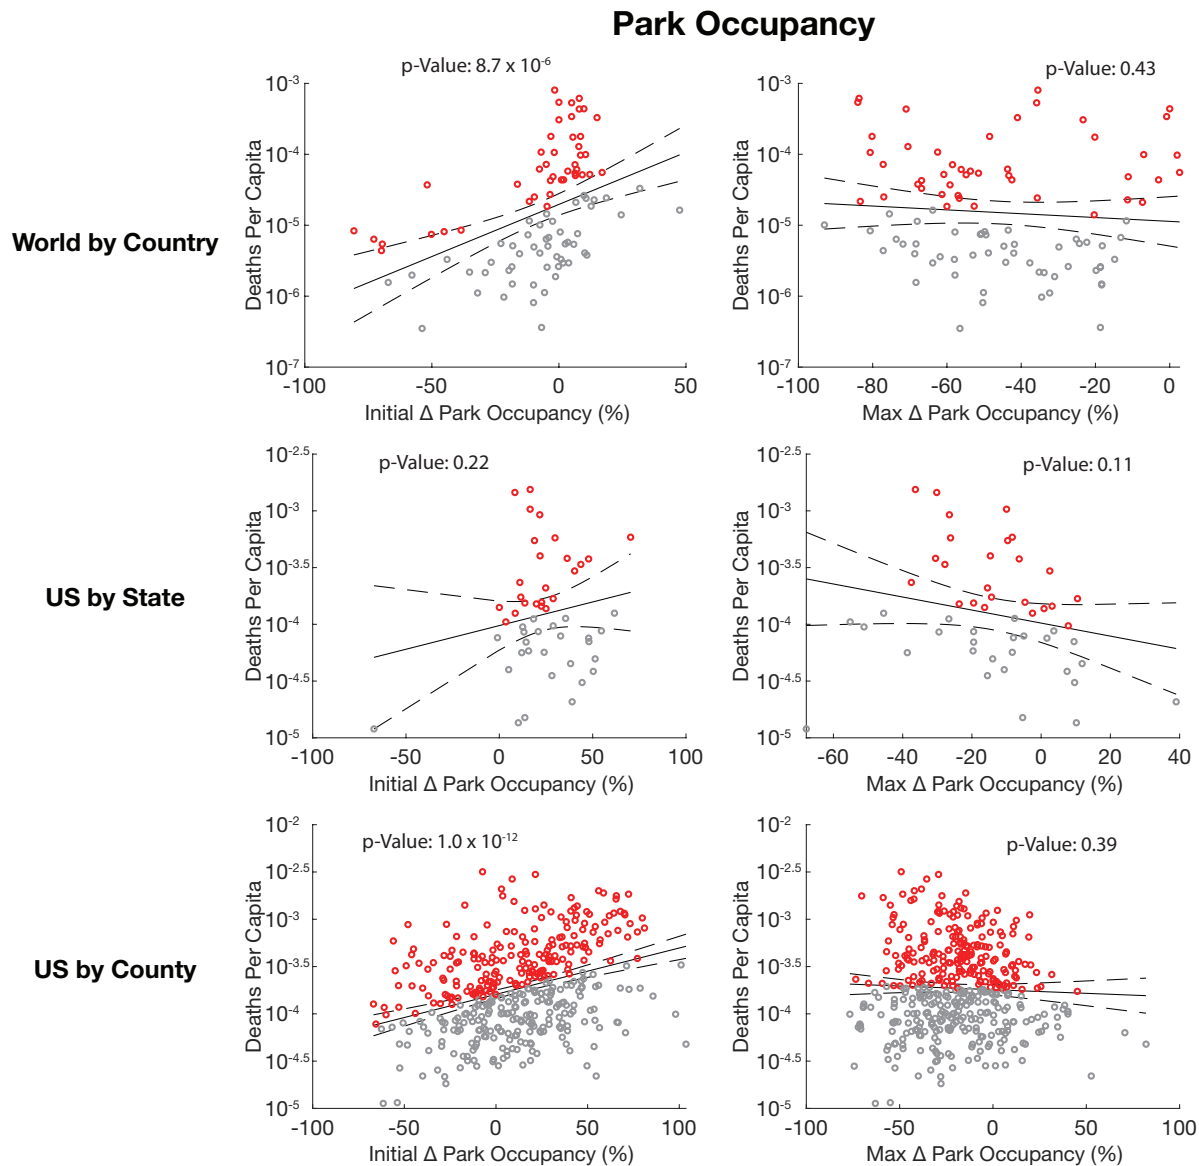

1069

1070 **Supplementary Figure 4: Correlation between park occupancy categories and death does**  
1071 **not invert over time**

1072 (1<sup>st</sup> column) Linear regressions of the initial change in park occupancy versus the deaths per  
1073 capita of all regions affected by COVID-19.

1074 (2<sup>nd</sup> column) Linear regressions of the maximum change in park occupancy versus the deaths per  
1075 capita of all regions affected by COVID-19.

1076 Rows represent linear regressions done on countries, states, and counties respectively.

1077

1078 Deaths per capita are totaled until May 24<sup>th</sup>, 2020. Solid black line represents the linear

1079 regression, dashed black lines represent 95% confidence intervals. Regression p-values below

1080 0.05 are listed in scientific notation. Red points represent regions that had higher death than

1081 predicted by the regression. Grey points represent regions that had lower death than predicted by

1082 the regression.

Supplementary Figure 5: Correlation between transit occupancy and death also inverts over time

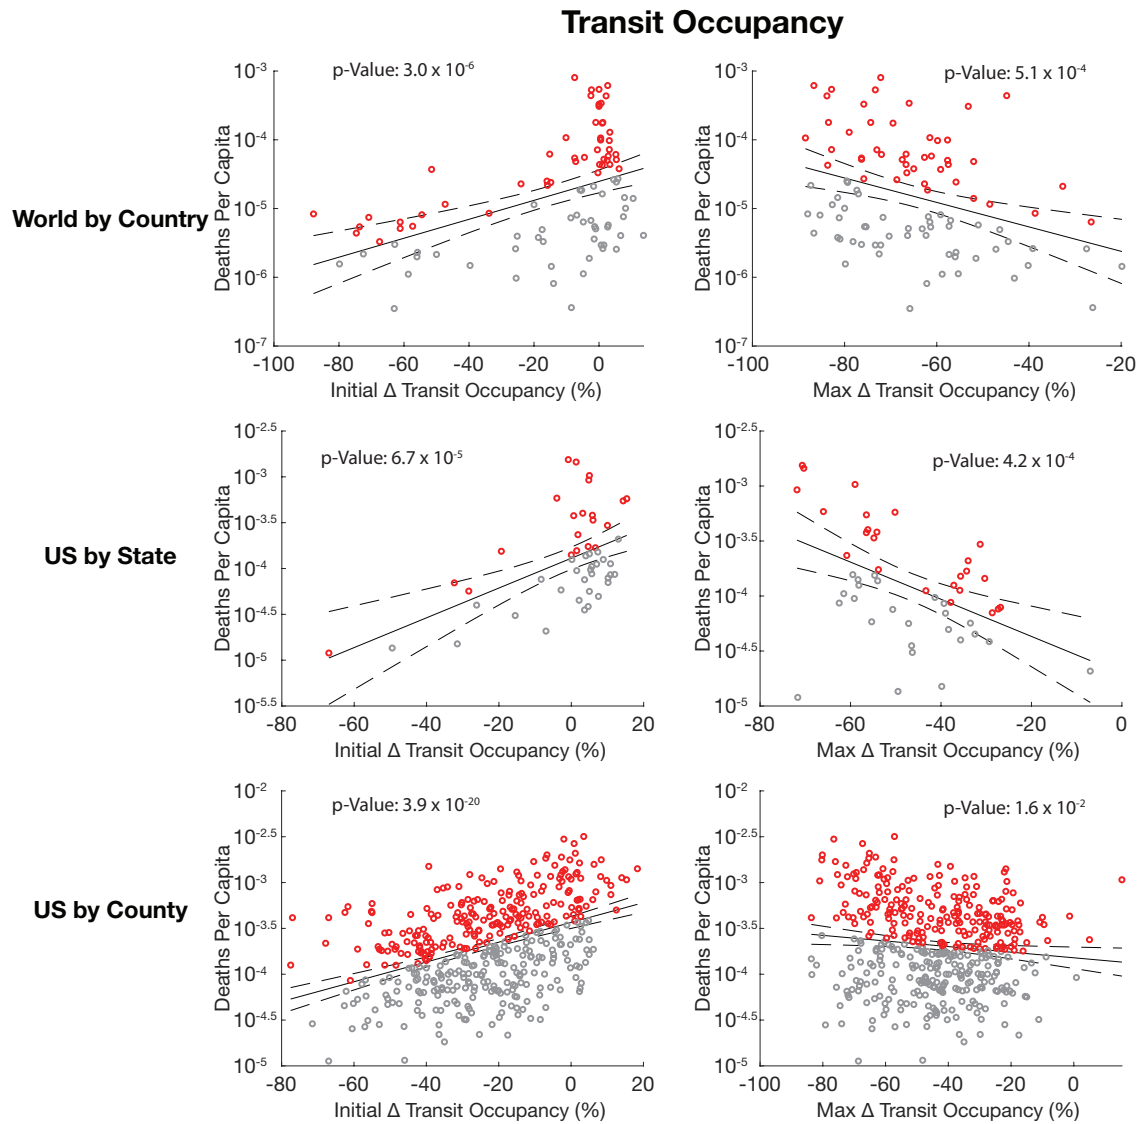

1083

1084 **Supplementary Figure 5: Correlation between transit occupancy and death also inverts**  
1085 **over time**

1086 (1<sup>st</sup> column) Linear regressions of the initial change in transit occupancy versus the deaths per  
1087 capita of all regions affected by COVID-19.

1088 (2<sup>nd</sup> column) Linear regressions of the maximum change in transit occupancy versus the deaths  
1089 per capita of all regions affected by COVID-19.

1090 Rows represent linear regressions done on countries, states, and counties respectively.

1091

1092 Deaths per capita are totaled until May 24<sup>th</sup>, 2020. Solid black line represents the linear  
1093 regression, dashed black lines represent 95% confidence intervals. Regression p-values below  
1094 0.05 are listed in scientific notation. Red points represent regions that had higher death than  
1095 predicted by the regression. Grey points represent regions that had lower death than predicted by  
1096 the regression.

Supplementary Figure 6: Correlation between workplace occupancy and death also inverts over time

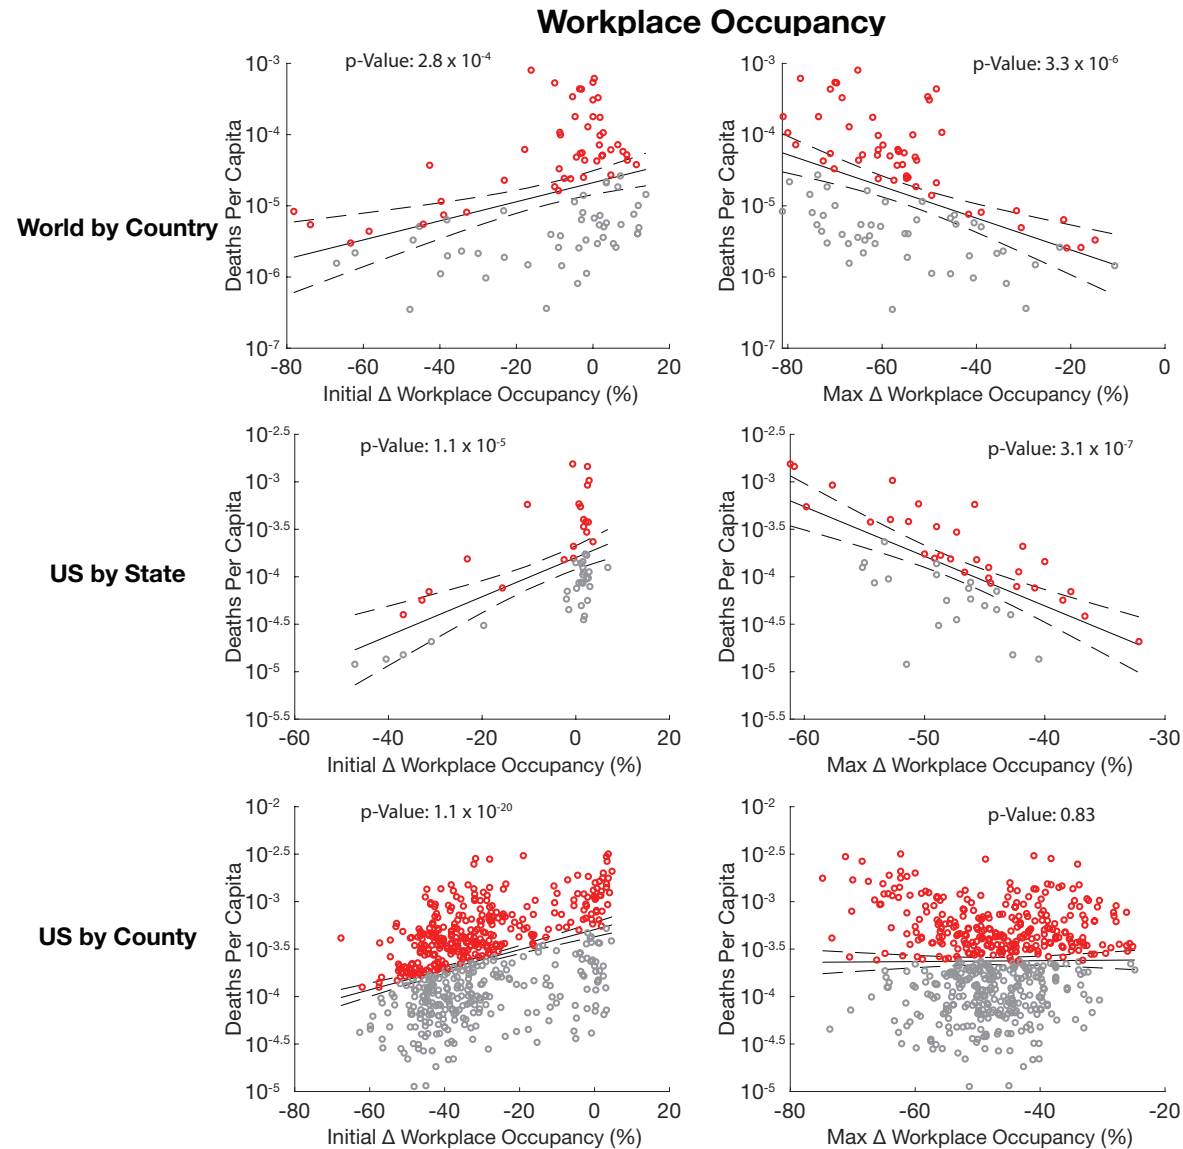

1097

1098 **Supplementary Figure 6: Correlation between workplace occupancy categories and death**  
 1099 **also inverts over time**

1100 (1<sup>st</sup> column) Linear regressions of the initial change in workplace occupancy versus the deaths  
 1101 per capita of all regions affected by COVID-19.

1102 (2<sup>nd</sup> column) Linear regressions of the maximum change in workplace occupancy versus the  
 1103 deaths per capita of all regions affected by COVID-19.

1104 Rows represent linear regressions done on countries, states, and counties respectively.

1105

1106 Deaths per capita are totaled until May 24<sup>th</sup>, 2020. Solid black line represents the linear  
 1107 regression, dashed black lines represent 95% confidence intervals. Regression p-values below  
 1108 0.05 are listed in scientific notation. Red points represent regions that had higher death than  
 1109 predicted by the regression. Grey points represent regions that had lower death than predicted by  
 1110 the regression.

Supplementary Figure 7: Covariance between occupancy metrics does not cause inverted correlation between occupancy and death

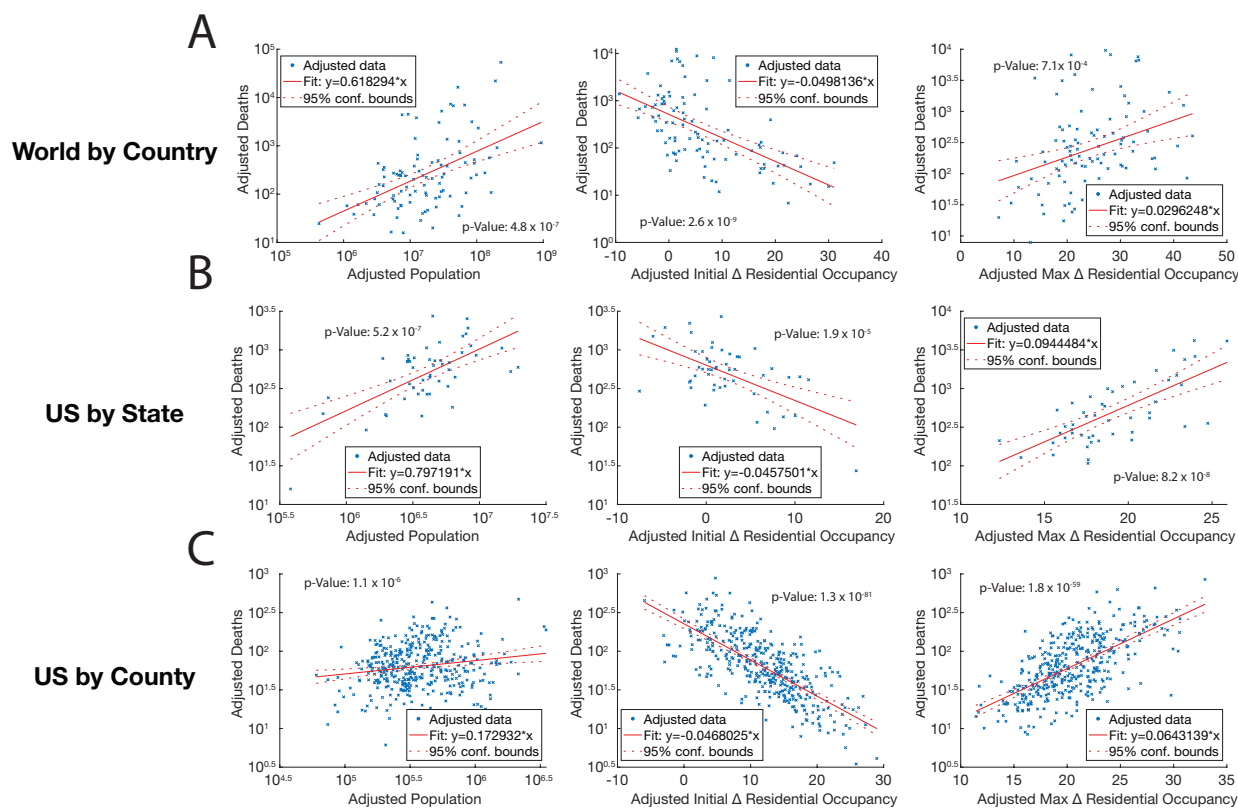

1111  
1112

**Supplementary Figure 7: Covariance between occupancy metrics does not cause inverted correlation between residential occupancy and death**

1113  
1114  
1115 A. Multi-factor linear regression between population, initial change in residential occupancy,  
1116 maximum change in residential occupancy, and confirmed COVID-19 deaths at the country  
1117 level.

1118 (1<sup>st</sup> column) Partial regression plot of population versus death.  
1119 (2<sup>nd</sup> column) Partial regression plot of initial change in residential occupancy versus death.  
1120 (3<sup>rd</sup> column) Partial regression plot of max change in residential occupancy versus death.  
1121

1122 B. Multi-factor linear regression between population, initial change in residential occupancy,  
1123 maximum change in residential occupancy, and confirmed COVID-19 deaths at the state level.

1124 (1<sup>st</sup> column) Partial regression plot of population versus death.  
1125 (2<sup>nd</sup> column) Partial regression plot of initial change in residential occupancy versus death.  
1126 (3<sup>rd</sup> column) Partial regression plot of max change in residential occupancy versus death.  
1127

1128 C. Multi-factor linear regression between population, initial change in residential occupancy,  
1129 maximum change in residential occupancy, and confirmed COVID-19 deaths at the county level.

1130 (1<sup>st</sup> column) Partial regression plot of population versus death.  
1131 (2<sup>nd</sup> column) Partial regression plot of initial change in residential occupancy versus death.  
1132 (3<sup>rd</sup> column) Partial regression plot of max change in residential occupancy versus death.  
1133

1134 A-C. Deaths per capita are totaled until May 24<sup>th</sup>, 2020. Solid red line represents the regression,  
1135 dashed red lines represent 95% confidence intervals. Regression p-values below 0.05 are listed in  
1136 scientific notation. Adjusted values are generated based on the co-dependencies of all the  
1137 variables in the model.  
1138

1139

1140

1141

1142

1143

1144

1145

1146

1147

1148

1149

1150

1151

1152

1153

1154

1155

1156

1157

1158

1159

1160

1161

1162

1163

1164

1165

Supplementary Figure 8: Statistical model of a non-linear correlation between population and death retains inversion of association between occupancy and death

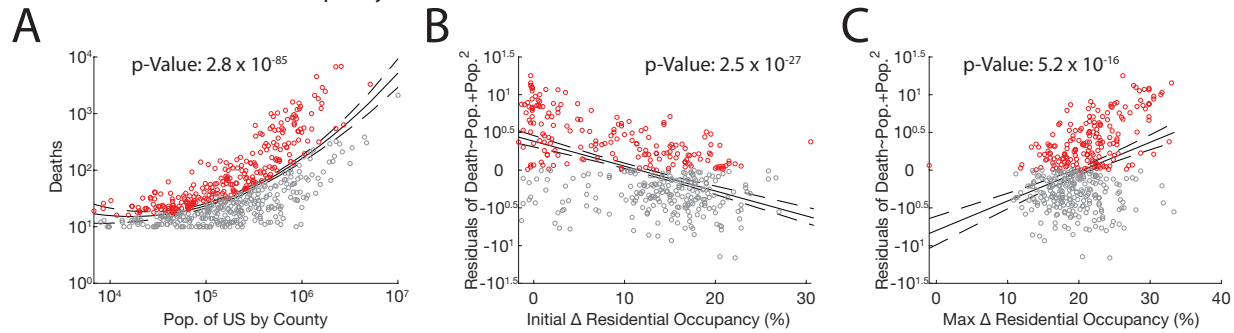

1166

1167

**Supplementary Figure 8: Statistical model of a non-linear correlation between population and death retains inversion of correlation between occupancy and death**

1168

1169

1170

A. Quadratic regression between US county population size and the number of confirmed COVID-19 deaths that county experienced as of May 24<sup>th</sup>, 2020. Regression shows that a model that accounts for the effect of population squared on death can capture the nonlinear relationship observed between population and death at the county level.

1171

1172

1173

1174

1175

B. Linear regression between the residuals from the quadratic regression in (A) and the initial

1176

change in residential occupancy. Regression finds a negative correlation between the two factors,

1177

similar to the relationship found in Fig. 1C.

1178

C. Linear regression between the residuals from the quadratic regression in (A) and the

1179

maximum change in residential occupancy. Regression finds a positive correlation between the

1180

two factors, similar to the relationship found in Fig. 1C.

1181

1182

A-C. Deaths per capita are totaled until May 24<sup>th</sup>, 2020. Solid black line represents the

1183

regression, dashed black lines represent 95% confidence intervals. Regression p-values below

1184

0.05 are listed in scientific notation. Red points represent regions that had higher death than

1185

predicted by the quadratic regression. Grey points represent regions that had lower death than

1186

predicted by the quadratic regression.

1187

1188

1189

1190

1191

1192

1193

1194

1195

1196

1197

Supplementary Figure 9: The correlation between Apple mobility and death inverts over time

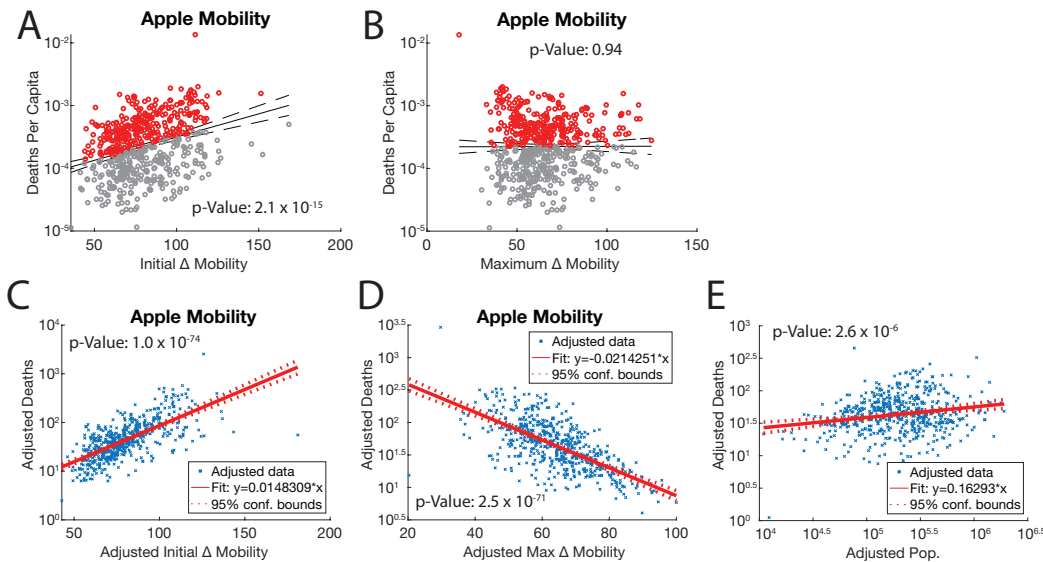

1198

1199 **Supplementary Figure 9: The correlation between Apple mobility and death inverts over**  
1200 **time**

1201 A. Linear regression of the initial change in driving mobility (from Apple) versus the confirmed  
1202 deaths per capita of all counties affected by COVID-19.

1203  
1204 B. Linear regression of the maximum change in driving mobility (from Apple) versus the  
1205 confirmed deaths per capita of all counties affected by COVID-19.

1206  
1207 C. Multifactor linear regression of initial change in mobility, maximum change in mobility,  
1208 population, and deaths. Partial regression plot of initial change in driving mobility (from Apple)  
1209 versus confirmed deaths at the county level.

1210  
1211 D. Multifactor linear regression of maximum change in mobility, maximum change in mobility,  
1212 population, and deaths. Partial regression plot of maximum change in driving mobility (from  
1213 Apple) versus confirmed deaths at the county level.

1214  
1215 E. Multifactor linear regression of initial change in mobility, maximum change in mobility,  
1216 population, and deaths. Partial regression plot of county population versus confirmed deaths.

1217  
1218 A-E. Confirmed COVID-19 deaths are totaled until May 24<sup>th</sup>, 2020. Solid line represents the  
1219 regression, dashed lines represent 95% confidence intervals. Regression p-values below 0.05 are  
1220 listed in scientific notation. Adjusted values are generated based on the co-dependencies of all  
1221 the variables in the model. Red points represent regions that had higher death than predicted by  
1222 the regression. Grey points represent regions that had lower death than predicted by the  
1223 regression.

1224  
1225 C&D. Linear regression of the first peak of infections per day versus the time it took to reach that  
1226 peak for real infection counts recorded in countries internationally. Points represent individual  
1227 regions, solid line represents linear regression, and dotted lines represent 95% confidence interval.

Supplementary Figure 10: Occupancy under the curve is perversely correlated with COVID-19 mortality

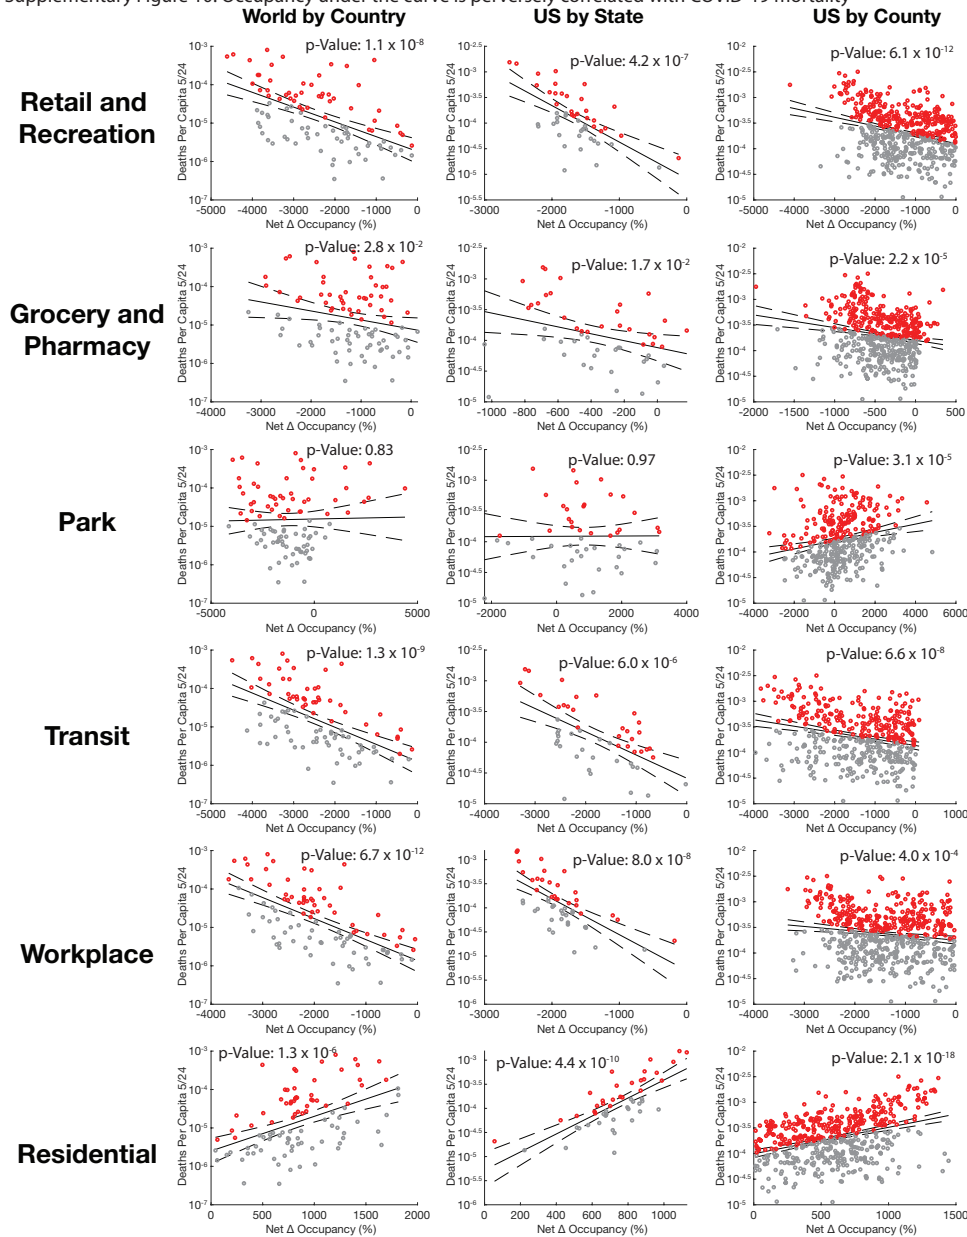

1228

1229 **Supplementary Figure 10: Occupancy under the curve is perversely correlated with**  
 1230 **COVID-19 mortality**

1231 Linear regressions of net changes in residential occupancy versus confirmed deaths per capita.

1232 Columns - Country, state, and county data

1233 Rows- Retail & recreation, grocery & pharmacy, park, transit, workplace, and residential

1234 occupancy.

1235

1236 Deaths per capita are totaled until May 24<sup>th</sup>, 2020. Solid black line represents the linear

1237 regression, dashed black lines represent 95% confidence intervals. Regression p-values below

1238 0.05 are listed in scientific notation. Red points represent regions that had higher death than

1239 predicted by the regression. Grey points represent regions that had lower death than predicted by

1240 the regression.



Supplementary Figure 11: Dynamic changes in induced sequestration are not sufficient to generate inverted occupancy-death correlation

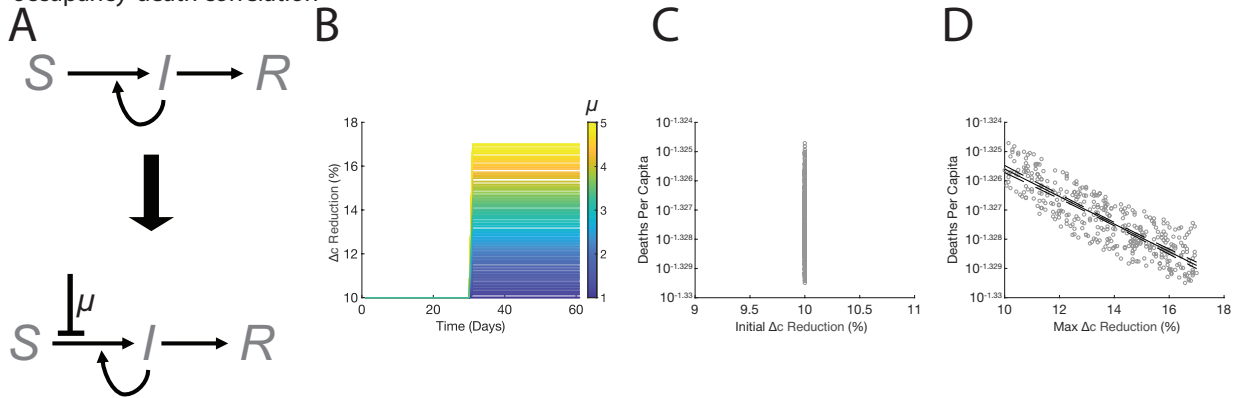

1241  
1242 **Supplementary Figure 11: Dynamic changes in induced sequestration are not sufficient to**  
1243 **generate inverted occupancy-death correlation**  
1244

1245 A. Schematic of epidemic ODE model with induced sequestration implemented partway through  
1246 epidemic.

1247  
1248 B. Trends in contact rate reduction over time as determined by delayed induced sequestration.  
1249 Stronger induced sequestration values ( $\mu$ ) lead to a larger reduction in contact rates. Induced  
1250 sequestration is applied after 30 days in this simulation and remains constant for 30 days after  
1251 application.

1252  
1253 C. Linear regression of simulated deaths versus initial changes in contact rate reduction  
1254 generated by an SIR model with policy implemented partway through epidemic. Initial changes  
1255 in contact rate reduction are not correlated with any changes in death.

1256  
1257 D. Linear regression of simulated deaths versus maximum changes in contact rate reduction  
1258 generated by an SIR model with induced sequestration implemented partway through epidemic.  
1259 Maximum changes in contact rate reduction are negatively correlated with death (p-value:  $8.9 \times$   
1260  $10^{-110}$ ).

1261  
1262  
1263  
1264  
1265  
1266  
1267  
1268  
1269  
1270  
1271  
1272  
1273  
1274  
1275

Supplementary Figure 12: Coincidental population sequestration during an epidemic is not sufficient to invert mobility-death correlation

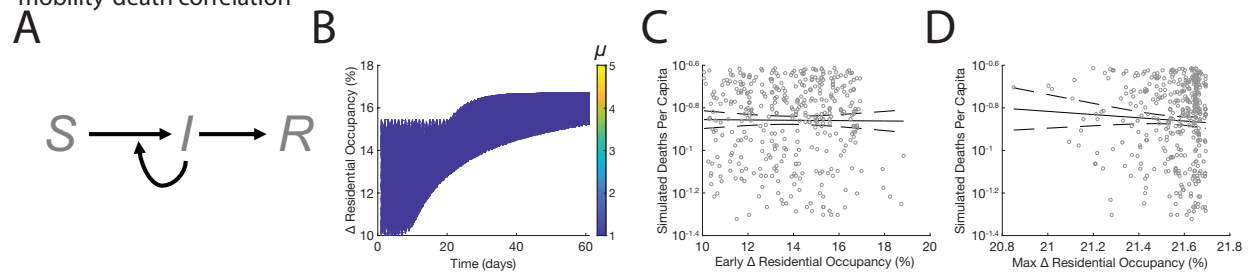

1276  
1277  
1278  
1279  
1280  
1281  
1282  
1283  
1284  
1285  
1286  
1287  
1288  
1289  
1290  
1291  
1292  
1293  
1294  
1295  
1296  
1297  
1298  
1299  
1300  
1301  
1302  
1303  
1304  
1305

**Supplementary Figure 12: Coincidental population sequestration during an epidemic is not sufficient to invert mobility-death correlation**

A. Schematic of the simple SIRD model [Eqs. 1-4] with no sequestration [Eq. S1] where contact-reduction rate  $c = 1$ .

B. Example curves of randomly selected residential occupancy values taken from an increasing distribution. This represents a scenario where residential occupancy increases coincidentally with the emergence of COVID-19, but has no functional relationship with the pandemic.

C-D. Numerical simulations of mortality (calculated as 1% of  $R/N$ ) as a function of initial and max changes in simulated residential occupancy from simple SIR model (regression  $p$ -values=0.76 and 0.99).

Supplementary Figure 13: Density and maximum residential occupancy do not have a synergistic correlation with death

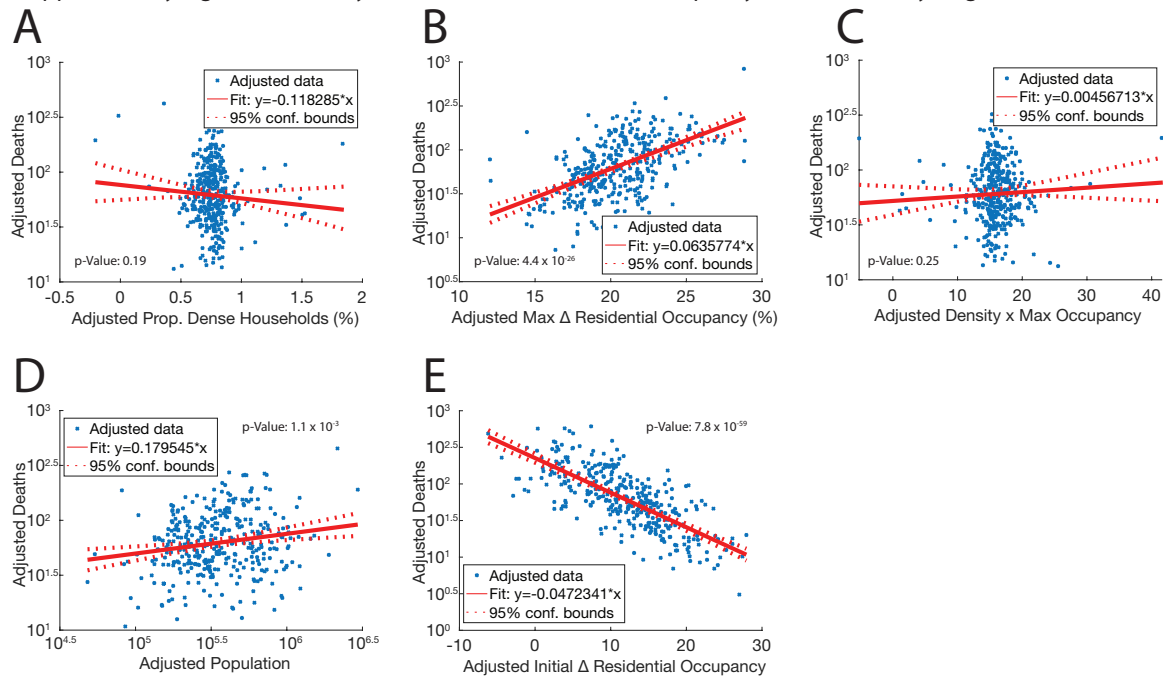

1306

1307 **Supplementary Figure 13: Density and maximum residential occupancy do not have a**  
1308 **synergistic correlation with death**

1309

1310 Multi-factor linear regression between proportion of dense households, maximum change in  
1311 residential occupancy, interaction between household density and maximum residential  
1312 occupancy, population, initial change in residential occupancy, and confirmed COVID-19 deaths  
1313 at the county level.

1314

1315 A. Partial regression plot of household density proportion as measured by the percentage of  
1316 homes in a county that had more than 1.5 people per room.

1317

1318 B. Partial regression plot of max change in residential occupancy versus death.

1319

1320 C. Partial regression plot of interaction between household density and maximum occupancy.

1321

1322 D. Partial regression plot of population versus death.

1323

1324 E. Partial regression plot of initial change in residential occupancy versus death.

1325

1326 A-E. Deaths per capita are totaled until May 24<sup>th</sup>, 2020. Solid red line represents the regression,  
1327 dashed red lines represent 95% confidence intervals. Regression p-values below 0.05 are listed in  
1328 scientific notation. Adjusted values are generated based on the co-dependencies of all the  
1329 variables in the model.

1330

1331

1332

Supplementary Figure 14: Changes in occupancy occur before local deaths are recorded

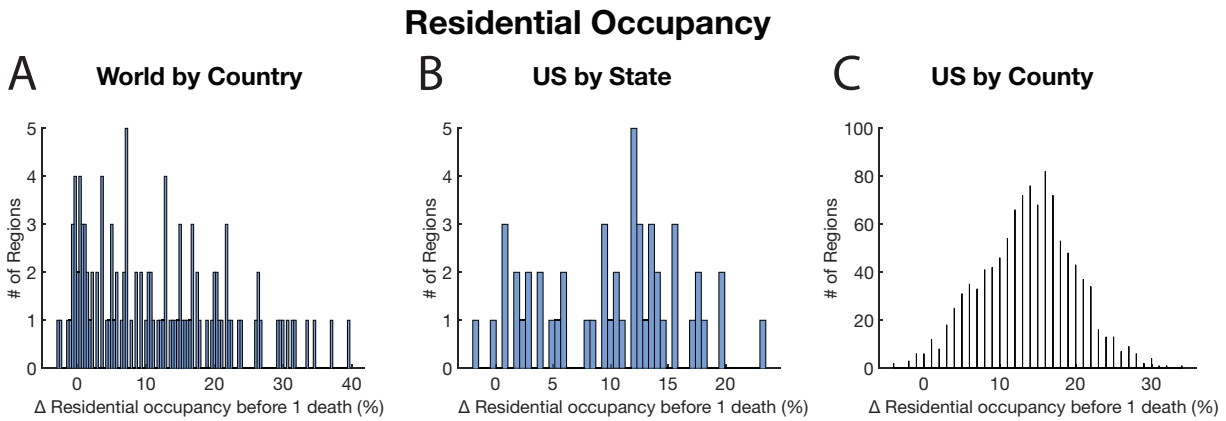

1333

1334 **Supplementary Figure 14: Changes in residential occupancy occur before local deaths are**  
1335 **recorded**

1336

1337 A. Histogram of the change in residential occupancy that occurs in countries before one death is  
1338 recorded in that country.

1339

1340 B. Histogram of the change in residential occupancy that occurs in states before one death is  
1341 recorded in that state.

1342

1343 C. Histogram of the change in residential occupancy that occurs in counties before one death is  
1344 recorded in that county.

1345

1346

1347

1348

1349

1350

1351

1352

1353

1354

1355

1356

1357

1358

1359

### Supplementary Figure 15: Early changes in policy are correlated with infection count

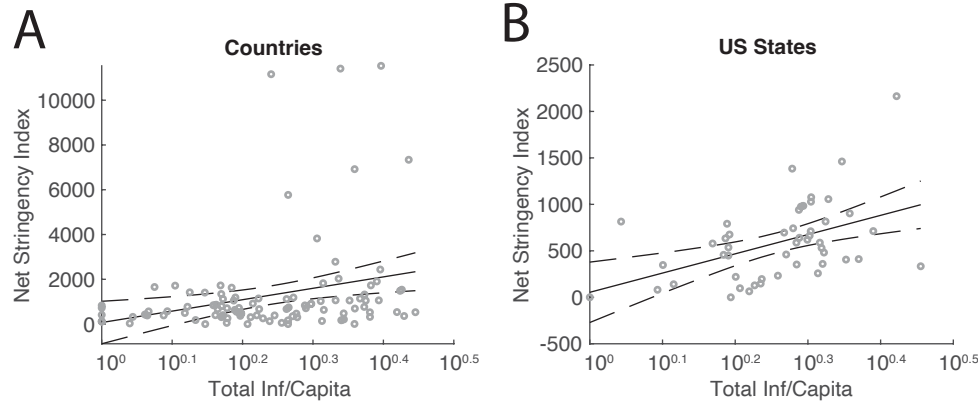

1360

### 1361 **Supplementary Figure 15: Early changes in policy are correlated with infection count**

1362 A. Regression of total infections per capita versus net stringency index for countries affected by  
1363 COVID-19. Infections per capita were totaled before a single death occurred in the region, and  
1364 the net stringency index was calculated over the same time period. The p-value of the linear  
1365 regression =  $5.8 \times 10^{-3}$  (dashed lines represent 95% confidence interval).

1366

1367 B. Regression of total infections per capita versus net stringency index for US states affected by  
1368 COVID-19. Infections per capita were totaled before a single death occurred in the region, and  
1369 the net stringency index was calculated over the same time period. The p-value of the linear  
1370 regression =  $9.6 \times 10^{-4}$  (dashed lines represent 95% confidence interval).

1371

1372

1373

1374

1375

1376

1377

1378

1379

1380

1381

1382

Supplementary Figure 16: Modulation of transmission rate constant is not sufficient to control infection rate variation

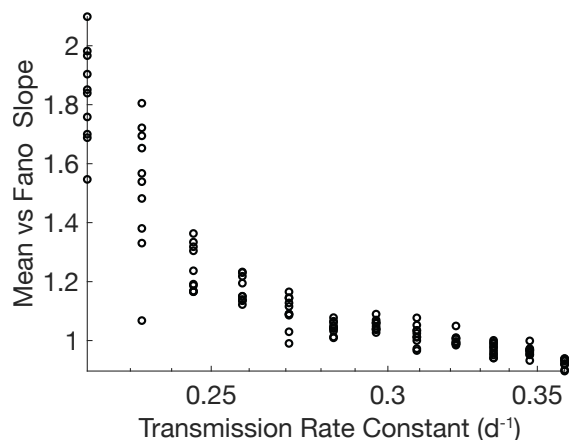

1383

1384 **Supplementary Figure 16: Modulation of transmission rate constant is not sufficient to**  
1385 **control infection rate variation**

1386

1387 Summary diagram of the effect that changing the transmission rate constant ( $\beta$ ) has on the  
1388 regressed slope of simulated Fano factor versus mean plots. Graph shows that increasing the  
1389 transmission rate constant can reduce the slope to one, but not below one.

1390

1391

1392

1393

1394

1395

1396

1397

1398

1399

1400

1401

1402

1403

1404

1405

1406

1407

### Supplementary Figure 17: Early variation in infections per day is suppressed

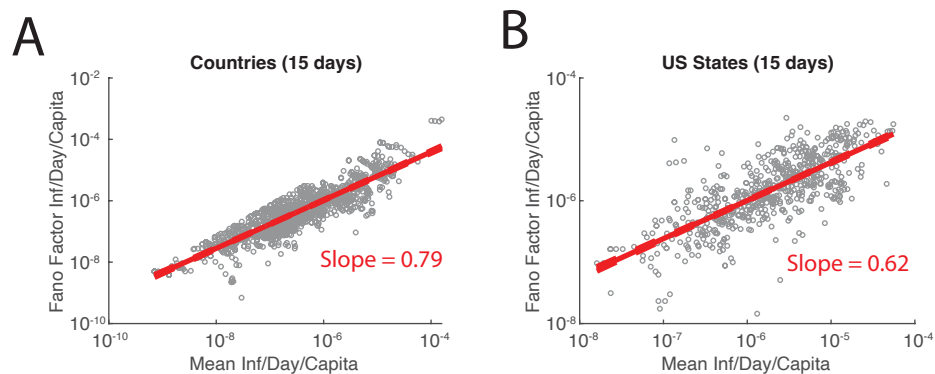

1408

### 1409 **Supplementary Figure 17: Early variation in infections per day is suppressed**

1410 A. Data of Fano factor versus mean of the first 15 days of infection for countries affected by  
1411 COVID-19. Slope of linear regression = 0.79 (dashed red lines represent 95% confidence  
1412 interval).

1413

1414 B. Fano factor versus mean plot of the first 15 days of infection for US states affected by  
1415 COVID-19. Linear regression slope = 0.62 (dashed red lines represent 95% confidence interval).

1416

1417

1418

1419

1420

1421

1422

1423

1424

1425

1426

1427

1428

1429

1430

Supplementary Figure 18: Strengthening infectivity leads to larger, faster waves

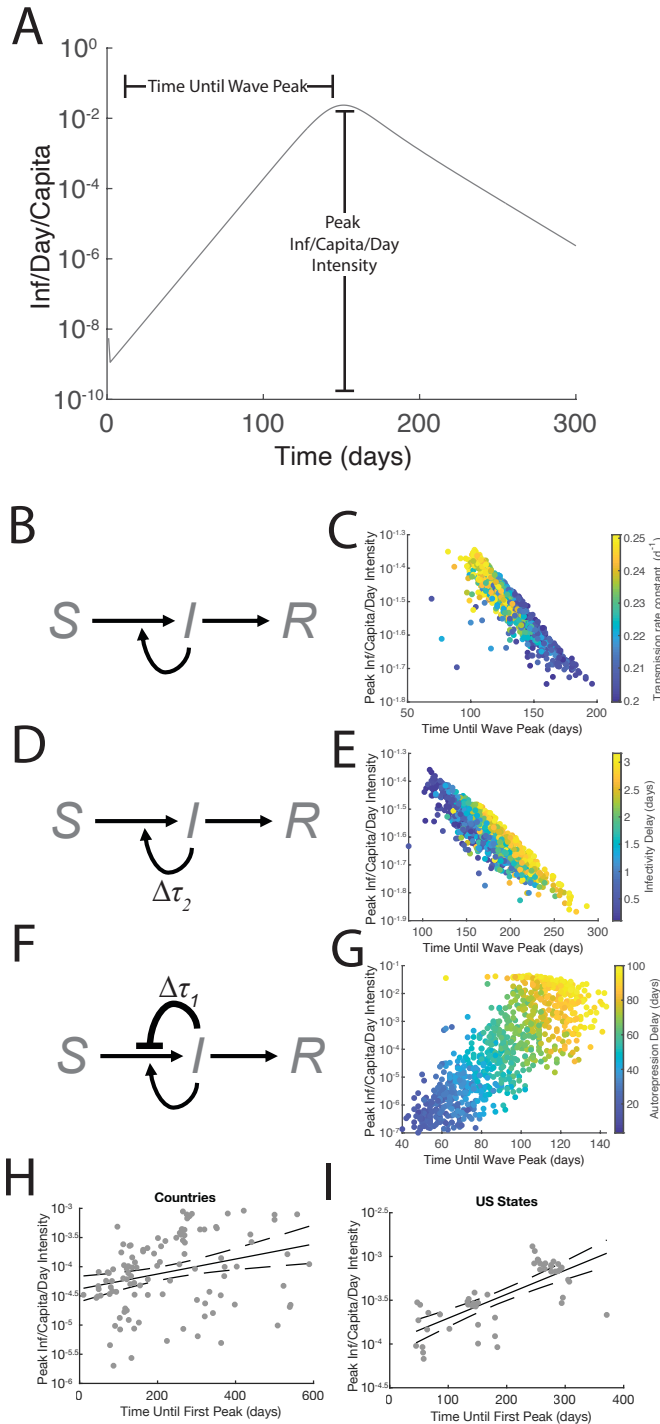

1431

1432 **Supplementary Figure 17: Strengthening infectivity leads to stronger, faster waves**

1433 A. Example simulated epidemic to illustrate the calculation of parameters necessary to quantify  
1434 the timing and intensity of infection waves.

1435

1436 B. Schematic of the simple SIR model [Eqs. 1-4].

1437



- 1438 C. Plot of a series of epidemic simulations where infection wave timing vs intensity has been  
1439 quantified. Color of points represents value of transmission rate constant ( $\beta$ ).  
1440
- 1441 D. Schematic of the simple SIR model with a delay in susceptible individuals becoming infective  
1442 [Eqs. S3-S6].  
1443
- 1444 E. Plot of a series of epidemic simulations where infection wave timing vs intensity has been  
1445 quantified. Color of points represents value of infectivity delay ( $\tau_2$ ).  
1446
- 1447 F. Schematic of the SIR model with delayed autorepression [Eqs. 1-4, S2].  
1448
- 1449 G. Plot of a series of epidemic simulations where infection wave timing vs intensity has been  
1450 quantified. Color of points represents value of autorepression delay ( $\tau_1$ ).  
1451
- 1452 H. Linear regression of measured values for time until first peak of infections per day versus  
1453 peak infections per day at the international scale, p-value:  $2.5 \times 10^{-3}$ . Points represent individual  
1454 regions, solid line represents linear regression, and dotted lines represent 95% confidence  
1455 interval.  
1456
- 1457 I. Linear regression of measured values for time until first peak of infections per day versus peak  
1458 infections per day at the US state scale, p-value:  $2.7 \times 10^{-9}$ . Points represent individual regions,  
1459 solid line represents linear regression, and dotted lines represent 95% confidence interval.  
1460  
1461
